# Supplementary material for: Aromatic compounds from an aqueous extract of “ban lan gen” and their antiviral activities
Source: PubMed Central journal article supplement — Acta Pharm Sin B. 2016 Nov 8;7(2):179–84. doi: 10.1016/j.apsb.2016.09.004 (PMC5343108; doi:10.1016/j.apsb.2016.09.004), 2016-11-08
Supplement: mmc1.pdf [file mmc1.pdf]

# **Aromatic compounds from an aqueous extract of “ban lan gen” and their antiviral activities**

Yu-Feng Liu<sup>a,b</sup>, Ming-Hua Chen<sup>a,c</sup>, Qing-Lan Guo<sup>a</sup>, Yu-Huan Li<sup>c</sup>, Jian-Dong Jiang<sup>a,c</sup>, and Jian-Gong Shi<sup>a,\*</sup>

*<sup>a</sup> State Key Laboratory of Bioactive Substance and Function of Natural Medicines, Institute of Materia Medica, Chinese Academy of Medical Sciences and Peking Union Medical College, Beijing 100050, China;*

*<sup>b</sup> Department of Pharmacy, Jining Medical University, Jining 272067, China;*

*<sup>c</sup> Institute of Medicinal Biotechnology, Chinese Academy of Medical Sciences and Peking Union Medical College, Beijing 100050, China*

## **Supporting Information**

---

\* Corresponding author. E-mail: shijg@imm.ac.cn.

## List of Contents

| No. | Content                                                                                                                                                                                                             | Page |
|-----|---------------------------------------------------------------------------------------------------------------------------------------------------------------------------------------------------------------------|------|
| 1   | <b>Figure S1</b> The UV spectrum of compound (–)- <b>1</b> in MeOH.                                                                                                                                                 | S3   |
| 2   | <b>Figure S2.</b> The IR spectrum of compound <b>1</b> .                                                                                                                                                            | S4   |
| 3   | <b>Figure S3.</b> The ESI mass spectrum of compound <b>1</b> .                                                                                                                                                      | S5   |
| 4   | <b>Figure S4.</b> The (+)-HRESIMS report of compound <b>1</b> , page 1.                                                                                                                                             | S6   |
| 5   | <b>Figure S5.</b> The (+)-HRESIMS report of compound <b>1</b> , page 2.                                                                                                                                             | S7   |
| 6   | <b>Figure S6.</b> The (+)-HRESIMS report of compound <b>1</b> , page 3.                                                                                                                                             | S8   |
| 7   | <b>Figure S7.</b> The <sup>1</sup> H NMR spectrum of compound <b>1</b> in DMSO- <i>d</i> <sub>6</sub> (600 MHz).                                                                                                    | S9   |
| 8   | <b>Figure S8.</b> The <sup>13</sup> C NMR spectrum of compound <b>1</b> in DMSO- <i>d</i> <sub>6</sub> (150MHz).                                                                                                    | S10  |
| 9   | <b>Figure S9.</b> The DEPT spectrum of compound <b>1</b> in DMSO- <i>d</i> <sub>6</sub> (150 MHz).                                                                                                                  | S11  |
| 10  | <b>Figure S10.</b> The COSY spectrum of compound <b>1</b> in DMSO- <i>d</i> <sub>6</sub> (600 MHz).                                                                                                                 | S12  |
| 11  | <b>Figure S11.</b> The HSQC spectrum of compound <b>1</b> in DMSO- <i>d</i> <sub>6</sub> (600MHz for <sup>1</sup> H)                                                                                                | S13  |
| 12  | <b>Figure S12.</b> The HMBC spectrum of compound <b>1</b> in DMSO- <i>d</i> <sub>6</sub> (600 MHz for <sup>1</sup> H)                                                                                               | S14  |
| 13  | <b>Figure S13.</b> The HPLC chromatogram of <b>1</b> on Chiralpak AD-H column [5 μm, 250 × 10 mm; Flow rate: 1.5 mL/min; mobile phase: iPrOH:n-hexane mixture (4:1, containing 0.1% TFA, v/v/v); temperature 23 °C] | S15  |
| 14  | <b>Figure S14</b> The UV spectrum of compound (–)- <b>1</b> in MeOH.                                                                                                                                                | S16  |
| 15  | <b>Figure S15</b> The CD spectrum of (–)- <b>1</b> in MeOH                                                                                                                                                          | S17  |
| 16  | <b>Figure S16</b> The CD spectrum of (+)- <b>1</b> in MeOH                                                                                                                                                          | S18  |
| 17  | <b>Figure S17.</b> The <sup>1</sup> H NMR spectrum of compound (–)- <b>1</b> in DMSO- <i>d</i> <sub>6</sub> (600 MHz).                                                                                              | S19  |
| 18  | <b>Figure S18.</b> The <sup>1</sup> H NMR spectrum of compound (+)- <b>1</b> in DMSO- <i>d</i> <sub>6</sub> (600 MHz)                                                                                               | S20  |
| 19  | <b>Figure S19</b> The UV spectrum of compound <b>2</b> in MeOH.                                                                                                                                                     | S21  |
| 20  | <b>Figure S20.</b> The IR spectrum of compound <b>2</b> .                                                                                                                                                           | S22  |
| 21  | <b>Figure S21.</b> The ESI mass spectrum of compound <b>2</b> .                                                                                                                                                     | S23  |
| 22  | <b>Figure S22.</b> The (+)-HRESIMS report of compound <b>2</b> , page 1.                                                                                                                                            | S24  |
| 23  | <b>Figure S23.</b> The (+)-HRESIMS report of compound <b>2</b> , page 2.                                                                                                                                            | S25  |
| 24  | <b>Figure S24.</b> The (+)-HRESIMS report of compound <b>2</b> , page 3.                                                                                                                                            | S26  |
| 25  | <b>Figure S25.</b> The <sup>1</sup> H NMR spectrum of compound <b>2</b> in acetone- <i>d</i> <sub>6</sub> (500 MHz).                                                                                                | S27  |
| 26  | <b>Figure S26.</b> The <sup>13</sup> C NMR spectrum of compound <b>2</b> in acetone- <i>d</i> <sub>6</sub> (125MHz).                                                                                                | S28  |
| 27  | <b>Figure S27.</b> The COSY spectrum of compound <b>2</b> in acetone- <i>d</i> <sub>6</sub> (500 MHz).                                                                                                              | S29  |
| 28  | <b>Figure S28.</b> The HSQC spectrum of compound <b>2</b> in acetone- <i>d</i> <sub>6</sub> (500MHz for <sup>1</sup> H)                                                                                             | S30  |
| 29  | <b>Figure S29.</b> The HMBC spectrum of compound <b>2</b> in acetone- <i>d</i> <sub>6</sub> (500 MHz for <sup>1</sup> H)                                                                                            | S31  |
| 30  | <b>Figure S30.</b> The UV spectrum of compound <b>3</b> .                                                                                                                                                           | S32  |
| 31  | <b>Figure S31.</b> The IR spectrum of compound <b>3</b> .                                                                                                                                                           | S33  |
| 32  | <b>Figure S32.</b> The ESI mass spectrum of compound <b>3</b> .                                                                                                                                                     | S34  |
| 33  | <b>Figure S33.</b> The <sup>1</sup> H NMR spectrum of compound <b>3</b> in acetone- <i>d</i> <sub>6</sub> (500 MHz).                                                                                                | S35  |
| 34  | <b>Figure S34.</b> The <sup>13</sup> C NMR spectrum of compound <b>3</b> in acetone- <i>d</i> <sub>6</sub> (125MHz).                                                                                                | S36  |
| 35  | <b>Figure S35.</b> The HSQC spectrum of compound <b>3</b> in acetone- <i>d</i> <sub>6</sub> (500MHz for <sup>1</sup> H)                                                                                             | S37  |
| 36  | <b>Figure S36.</b> The HMBC spectrum of compound <b>3</b> in acetone- <i>d</i> <sub>6</sub> (500 MHz for <sup>1</sup> H)                                                                                            | S38  |

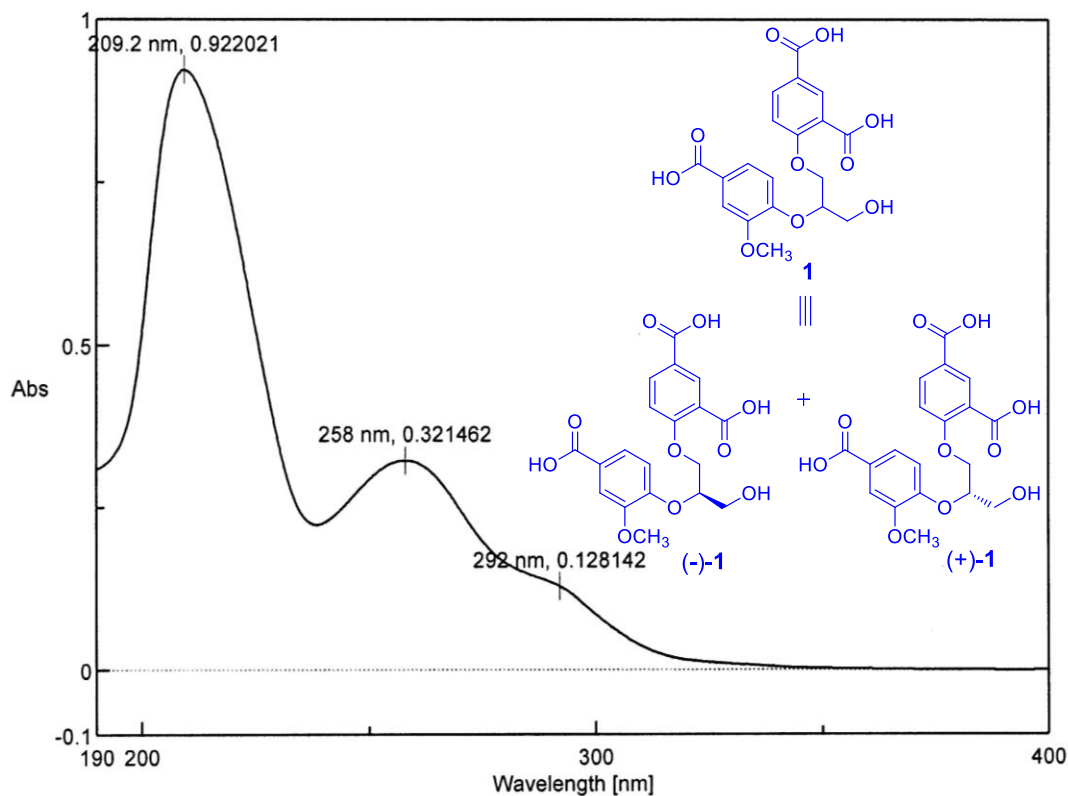

[Comment]  
 Sample Name BLG-L-118  
 Comment 0.02  
 User  
 Division UV  
 Company 324  
 [Measurement Information]  
 Instrument Name V-650  
 Model Name V-650  
 Serial No. A034461150

Accessory PSC-718  
 Accessory S/N A001761114  
 Position 1  
 Cell Length 10 mm  
 Temperature 19.94 C  
 Control Sensor Holder  
 Monitor Sensor Holder  
 Start Mode Start immediately

Photometric Mode Abs  
 Measurement range 400 - 190 nm  
 Data pitch 0.2 nm  
 Band width(UV/Vis) 2.0 nm  
 Response Medium  
 Scanning speed 200 nm/min  
 Source Change 340 nm  
 Light Source D2/WI  
 Filter Exchange Step  
 Correction Baseline

[Data Information]  
 Creation Date 2014-6-10 10:32  
 Data array type Linear data array  
 Horizontal Wavelength [nm]  
 Vertical Abs  
 Start 400 nm  
 End 190 nm  
 Data pitch 0.2 nm  
 Data points 1051

**Figure S1.** The UV spectrum of **1** in MeOH

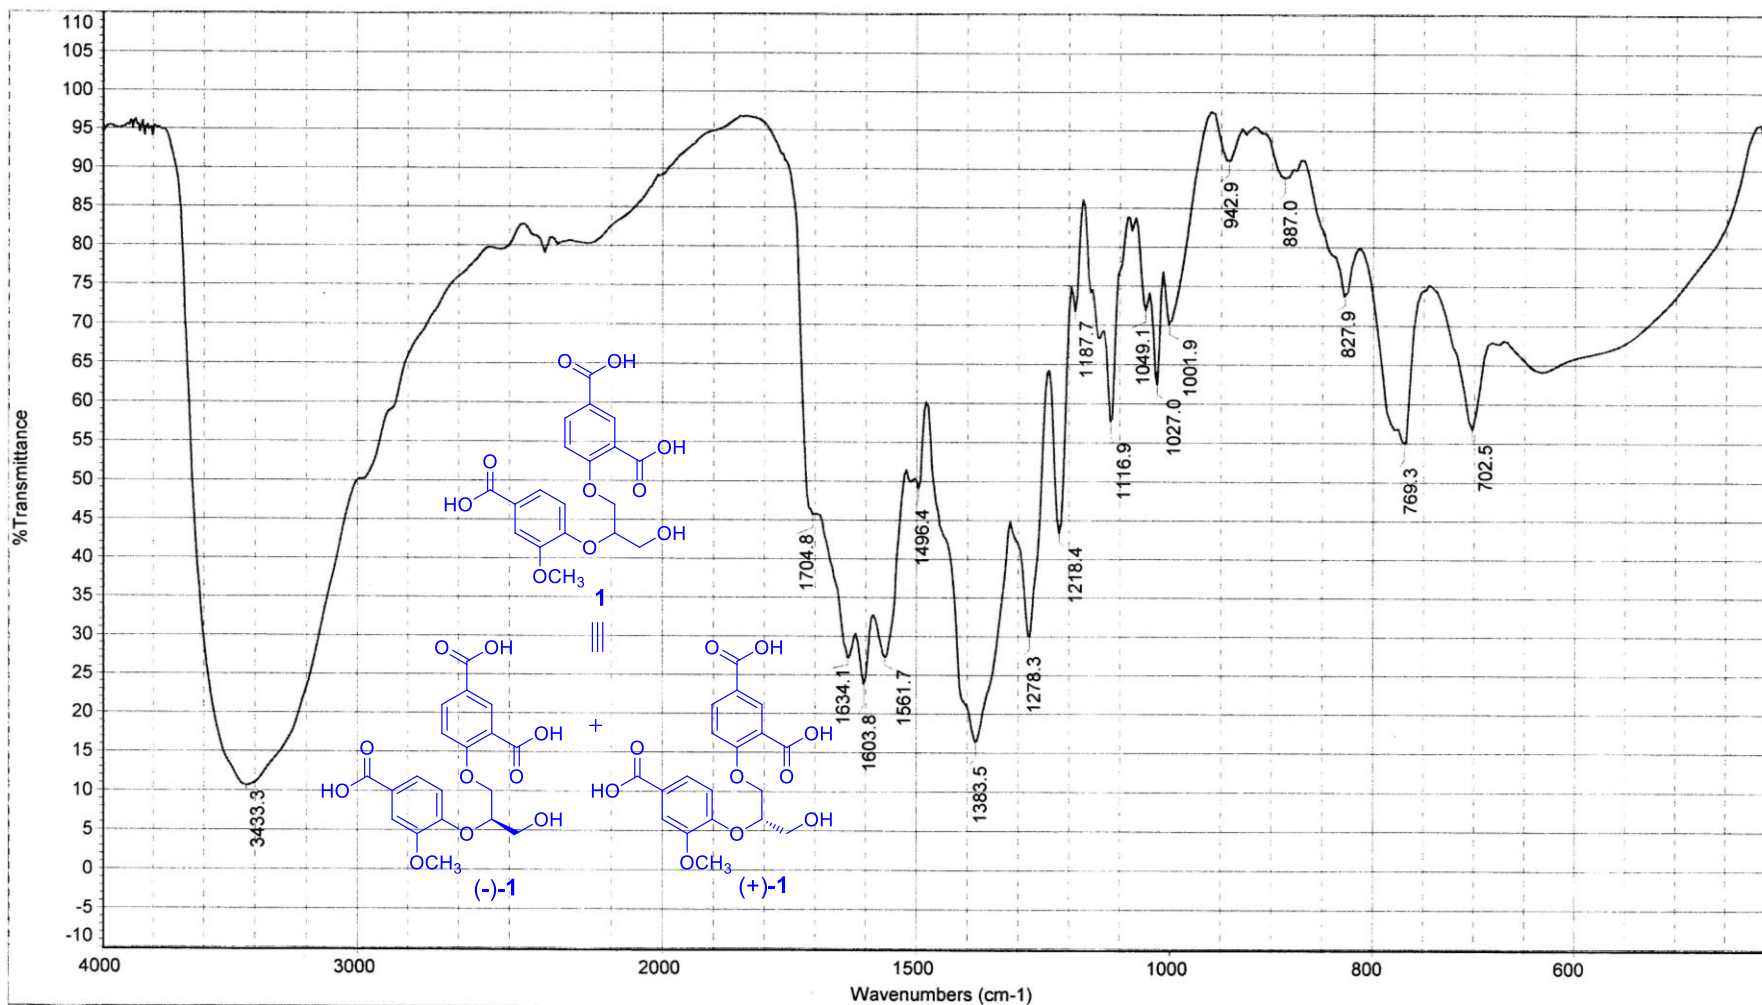

日期: 星期四 6月 26 09:43:10 2014 (GMT+08:00) Sample Name : BLG - L - 118rp

(显微镜透射法FT- IR Microscope Transmission)

扫描次数: 100

傅里叶变换显微镜红外(FT-IR Microscope): Centaurus

分辨率: 8.000

美国热电公司(Thermo)傅里叶变换红外光谱仪:Nicolet 5700

Figure S2. The IR spectrum of 1.

# Single Mass Spectrum Deconvolution Report

**Analysis Name:** liuyf200.d  
**Method:** TEST.MS  
**Sample Name:** BLG-L-118RP  
**Analysis Info:**

**Instrument:** LC-MSD-Trap-SL  
**Operator:** Operator

**Print Date:** 8/22/2013 11:56:16 AM  
**Acq. Date:** 8/22/2013 11:54:01 AM

## Acquisition Parameter:

|                 |            |                       |             |                |           |
|-----------------|------------|-----------------------|-------------|----------------|-----------|
| Mass Range Mode | Std/Normal | Trap Drive            | 53.0        | Scan Begin     | 100 m/z   |
| Ion Polarity    | Positive   | Octopole RF Amplitude | 171.0 Vpp   | Scan End       | 900 m/z   |
| Ion Source Type | ESI        | Capillary Exit        | -121.0 Volt | Averages       | 5 Spectra |
| Dry Temp (Set)  | 330 °C     | Skimmer               | -40.0 Volt  | Max. Accu Time | 200000 µs |
| Nebulizer (Set) | 15.00 psi  | Oct 1 DC              | -12.00 Volt | ICC Target     | 467       |
| Dry Gas (Set)   | 6.00 l/min | Oct 2 DC              | -1.70 Volt  | Charge Control | on        |

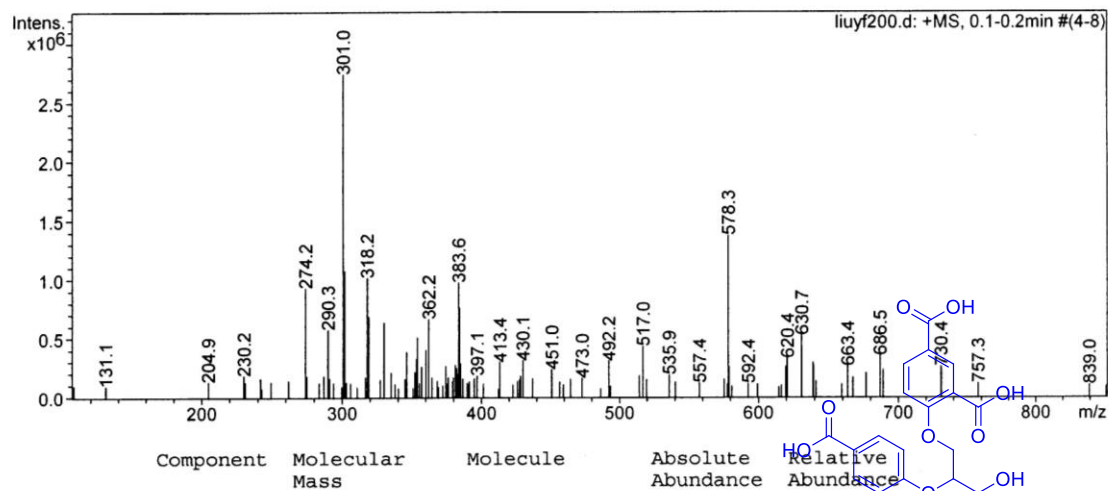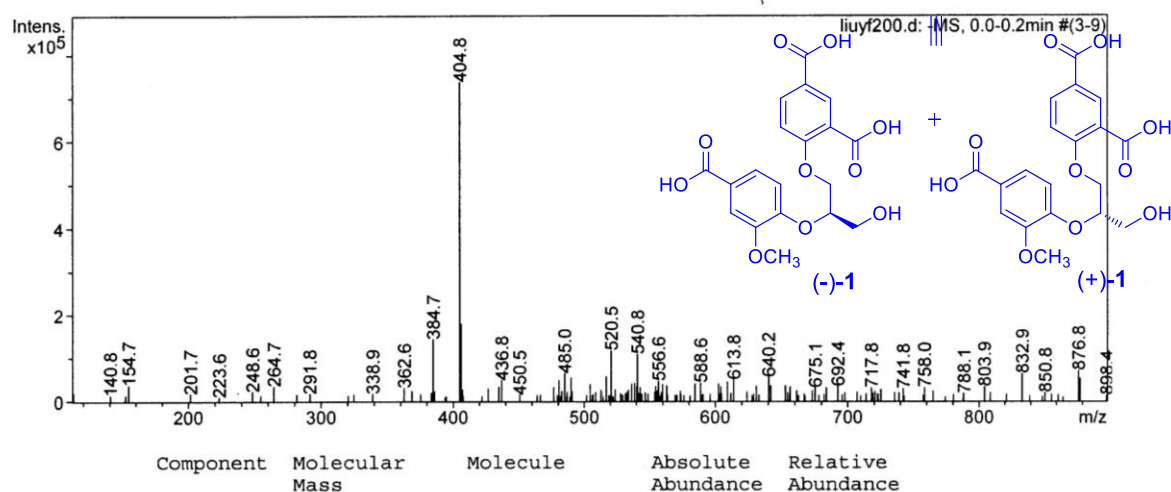

**Figure S3.** The ESI mass spectrum of **1**

# Qualitative Analysis Report

|                        |              |                               |             |
|------------------------|--------------|-------------------------------|-------------|
| <b>Data Filename</b>   | 2014051502.d | <b>Sample Name</b>            | BLG-L-118rp |
| <b>Sample Type</b>     | Sample       | <b>Position</b>               | P1-C2       |
| <b>Instrument Name</b> | Instrument 1 | <b>User Name</b>              |             |
| <b>Acq Method</b>      | TEST LCMS.m  | <b>IRM Calibration Status</b> | XXXXXXXXXX  |
| <b>DA Method</b>       | TEST LCMS.m  | <b>Comment</b>                |             |

## User Chromatograms

Fragmentor Voltage 135    Collision Energy 0    Ionization Mode ESI

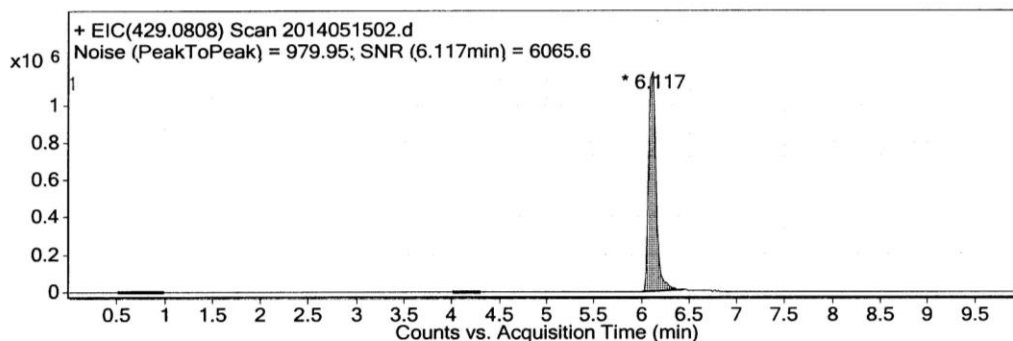

### Integration Peak List

| Peak | Start | RT    | End   | Height  | Area    | Area % | Signal To Noise |
|------|-------|-------|-------|---------|---------|--------|-----------------|
| 1    | 6.004 | 6.117 | 6.455 | 1171470 | 5943982 | 100    | 6065.6          |

### Noise Measurements

| Noise Type   | Signal Definition | Noise Multiplier | Noise Value |
|--------------|-------------------|------------------|-------------|
| Peak-to-Peak | Area              | 1                | 979.9468994 |

### Noise Regions

| Start | End |
|-------|-----|
| 0.5   | 1   |
| 4     | 4.3 |
| 9.99  | 11  |

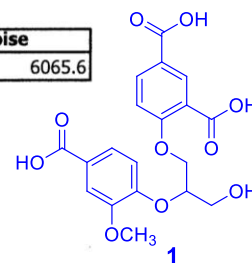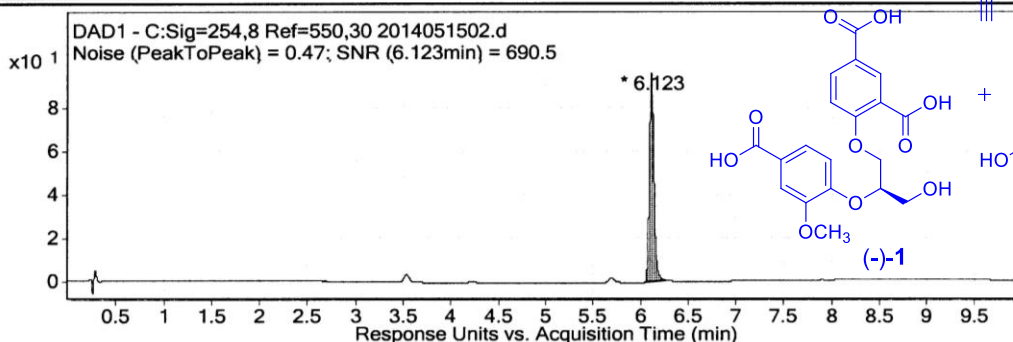

### Integration Peak List

| Peak | Start | RT    | End  | Height | Area   | Area % | Signal To Noise |
|------|-------|-------|------|--------|--------|--------|-----------------|
| 1    | 6.038 | 6.123 | 6.27 | 96.3   | 322.99 | 100    | 690.5           |

### Noise Measurements

| Noise Type   | Signal Definition | Noise Multiplier | Noise Value |
|--------------|-------------------|------------------|-------------|
| Peak-to-Peak | Area              | 1                | 0.467777252 |

### Noise Regions

| Start | End |
|-------|-----|
| 0.5   | 1   |
| 4     | 4.3 |
| 9.99  | 11  |

## User Spectra

Figure S4. The (+)-HRESIMS report of 1, page 1.

# Qualitative Analysis Report

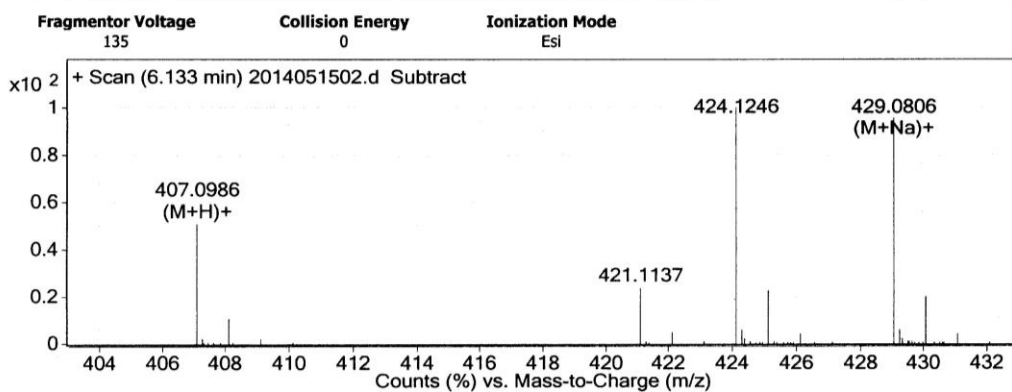

**Peak List**

| m/z      | z | Abund  | Formula        | Ion     |
|----------|---|--------|----------------|---------|
| 389.0878 | 1 | 453643 |                |         |
| 390.0905 | 1 | 100196 |                |         |
| 407.0986 | 1 | 505708 | C19 H19 O10    | (M+H)+  |
| 408.1012 | 1 | 107887 | C19 H19 O10    | (M+H)+  |
| 421.1137 | 1 | 235482 |                |         |
| 424.1246 | 1 | 998151 |                |         |
| 424.2951 |   | 58730  |                |         |
| 425.1278 | 1 | 225058 |                |         |
| 429.0806 | 1 | 958115 | C19 H18 Na O10 | (M+Na)+ |
| 430.0838 | 1 | 199649 | C19 H18 Na O10 | (M+Na)+ |

**Formula Calculator Element Limits**

| Element | Min | Max |
|---------|-----|-----|
| C       | 3   | 100 |
| H       | 0   | 500 |
| O       | 0   | 90  |
| N       | 0   | 5   |
| S       | 0   | 2   |
| Cl      | 0   | 0   |
| Br      | 0   | 0   |
| Si      | 0   | 0   |
| F       | 0   | 0   |
| P       | 0   | 0   |

**Formula Calculator Results**

| Formula          | Best | Mass     | Tgt Mass | Diff (ppm) | Ion Species         | Score |
|------------------|------|----------|----------|------------|---------------------|-------|
| C19 H18 O10      | TRUE | 406.0913 | 406.09   | -3.18      | C19 H19 O10         | 99.81 |
| C20 H14 N4 O6    |      | 406.0913 | 406.0913 | 0.1        | C20 H15 N4 O6       | 99.81 |
| C16 H22 O10 S    |      | 406.0913 | 406.0934 | 5.12       | C16 H23 O10 S       | 98.57 |
| C21 H18 N4 O S2  |      | 406.0913 | 406.0922 | 2.24       | C21 H19 N4 O S2     | 97.65 |
| C20 H22 O5 S2    |      | 406.0913 | 406.0909 | -1.05      | C20 H23 O5 S2       | 97.64 |
| C11 H22 N2 O12 S |      | 406.0913 | 406.0893 | -4.8       | C11 H23 N2 O12 S    | 97.03 |
| C19 H18 O10      | TRUE | 406.0914 | 406.09   | -3.42      | C19 H18 Na O10      | 99.82 |
| C20 H14 N4 O6    |      | 406.0914 | 406.0913 | -0.14      | C20 H14 N4 Na O6    | 99.75 |
| C16 H22 O10 S    |      | 406.0914 | 406.0934 | 4.87       | C16 H22 Na O10 S    | 98.71 |
| C20 H22 O5 S2    |      | 406.0914 | 406.0909 | -1.29      | C20 H22 Na O5 S2    | 97.58 |
| C21 H18 N4 O S2  |      | 406.0914 | 406.0922 | 1.99       | C21 H18 N4 Na O S2  | 97.55 |
| C11 H22 N2 O12 S |      | 406.0914 | 406.0893 | -5.04      | C11 H22 N2 Na O12 S | 97.19 |

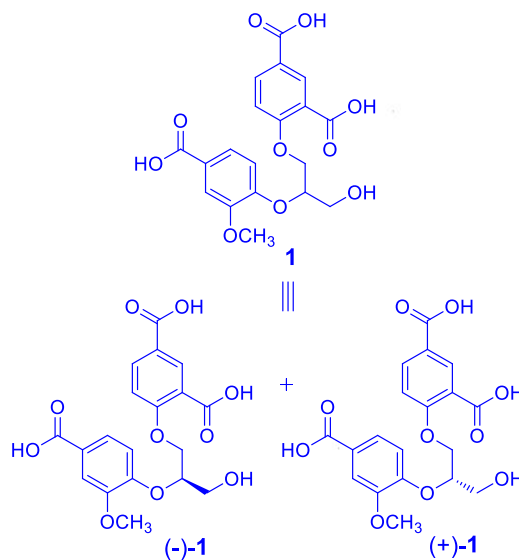

--- End Of Report ---

**Figure S5.** The (+)-HRESIMS report of **1**, page 2.

MS Formula Results: + Scan (6.133 min) Sub (2014051502.d)

| m/z      | Ion                | Formula     | Abundance |
|----------|--------------------|-------------|-----------|
| 407.0986 | (M+H) <sup>+</sup> | C19 H19 O10 | 505708.2  |

  

| Best | Formula (M)      | Ion Formula      | Calc m/z | Score | Cross S | Mass     | Calc Mass | Diff (ppm) | Abs Diff (ppm) | Abund Match | Spacing Mat | Mass Match | m/z      | DBE |
|------|------------------|------------------|----------|-------|---------|----------|-----------|------------|----------------|-------------|-------------|------------|----------|-----|
| ✓    | C19 H18 O10      | C19 H19 O10      | 407.0973 | 99.81 |         | 406.0913 | 406.09    | -3.18      | 3.18           | 99.99       | 99.88       | 99.67      | 407.0986 | 11  |
| ☐    | C20 H14 N4 O6    | C20 H15 N4 O6    | 407.0986 | 99.81 |         | 406.0913 | 406.0913  | 0.1        | 0.1            | 99.35       | 99.96       | 100        | 407.0986 | 16  |
| ☐    | C16 H22 O10 S    | C16 H23 O10 S    | 407.1006 | 98.57 |         | 406.0913 | 406.0934  | 5.12       | 5.12           | 96.69       | 99.7        | 99.14      | 407.0986 | 6   |
| ☐    | C21 H18 N4 O S2  | C21 H19 N4 O S2  | 407.0995 | 97.65 |         | 406.0913 | 406.0922  | 2.24       | 2.24           | 92.43       | 99.54       | 99.84      | 407.0986 | 15  |
| ☐    | C20 H22 O5 S2    | C20 H23 O5 S2    | 407.0981 | 97.64 |         | 406.0913 | 406.0909  | -1.05      | 1.05           | 92.2        | 99.53       | 99.96      | 407.0986 | 10  |
| ☐    | C11 H22 N2 O12 S | C11 H23 N2 O12 S | 407.0966 | 97.03 |         | 406.0913 | 406.0893  | -4.8       | 4.8            | 91.12       | 99.69       | 99.24      | 407.0986 | 2   |

  

| m/z      | Ion                 | Formula        | Abundance |
|----------|---------------------|----------------|-----------|
| 429.0806 | (M+Na) <sup>+</sup> | C19 H18 Na O10 | 958114.7  |

  

| Best | Formula (M)      | Ion Formula         | Calc m/z | Score | Cross S | Mass     | Calc Mass | Diff (ppm) | Abs Diff (ppm) | Abund Match | Spacing Mat | Mass Match | m/z      | DBE |
|------|------------------|---------------------|----------|-------|---------|----------|-----------|------------|----------------|-------------|-------------|------------|----------|-----|
| ✓    | C19 H18 O10      | C19 H18 Na O10      | 429.0792 | 99.82 |         | 406.0914 | 406.09    | -3.42      | 3.42           | 99.98       | 99.98       | 99.65      | 429.0806 | 11  |
| ☐    | C20 H14 N4 O6    | C20 H14 N4 Na O6    | 429.0806 | 99.75 |         | 406.0914 | 406.0913  | -0.14      | 0.14           | 99.15       | 99.98       | 100        | 429.0806 | 16  |
| ☐    | C16 H22 O10 S    | C16 H22 Na O10 S    | 429.0826 | 98.71 |         | 406.0914 | 406.0934  | 4.87       | 4.87           | 96.87       | 99.75       | 99.29      | 429.0806 | 6   |
| ☐    | C20 H22 O5 S2    | C20 H22 Na O5 S2    | 429.0801 | 97.58 |         | 406.0914 | 406.0909  | -1.29      | 1.29           | 91.96       | 99.57       | 99.95      | 429.0806 | 10  |
| ☐    | C21 H18 N4 O S2  | C21 H18 N4 Na O S2  | 429.0814 | 97.55 |         | 406.0914 | 406.0922  | 1.99       | 1.99           | 92.02       | 99.51       | 99.88      | 429.0806 | 15  |
| ☐    | C11 H22 N2 O12 S | C11 H22 N2 Na O12 S | 429.0786 | 97.19 |         | 406.0914 | 406.0893  | -5.04      | 5.04           | 91.69       | 99.68       | 99.24      | 429.0806 | 2   |

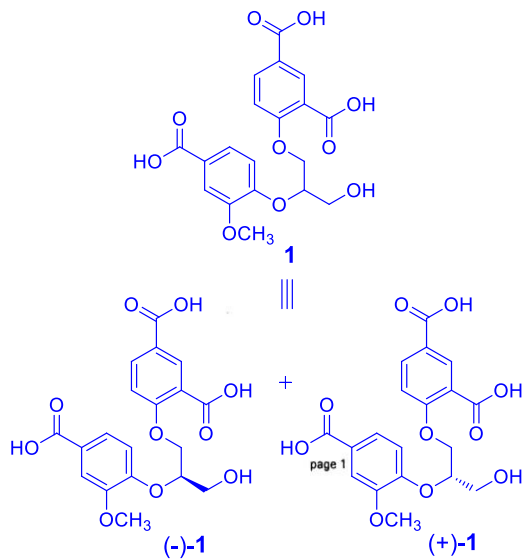

Figure S6. The (+)-HRESIMS report of 1, page 3.



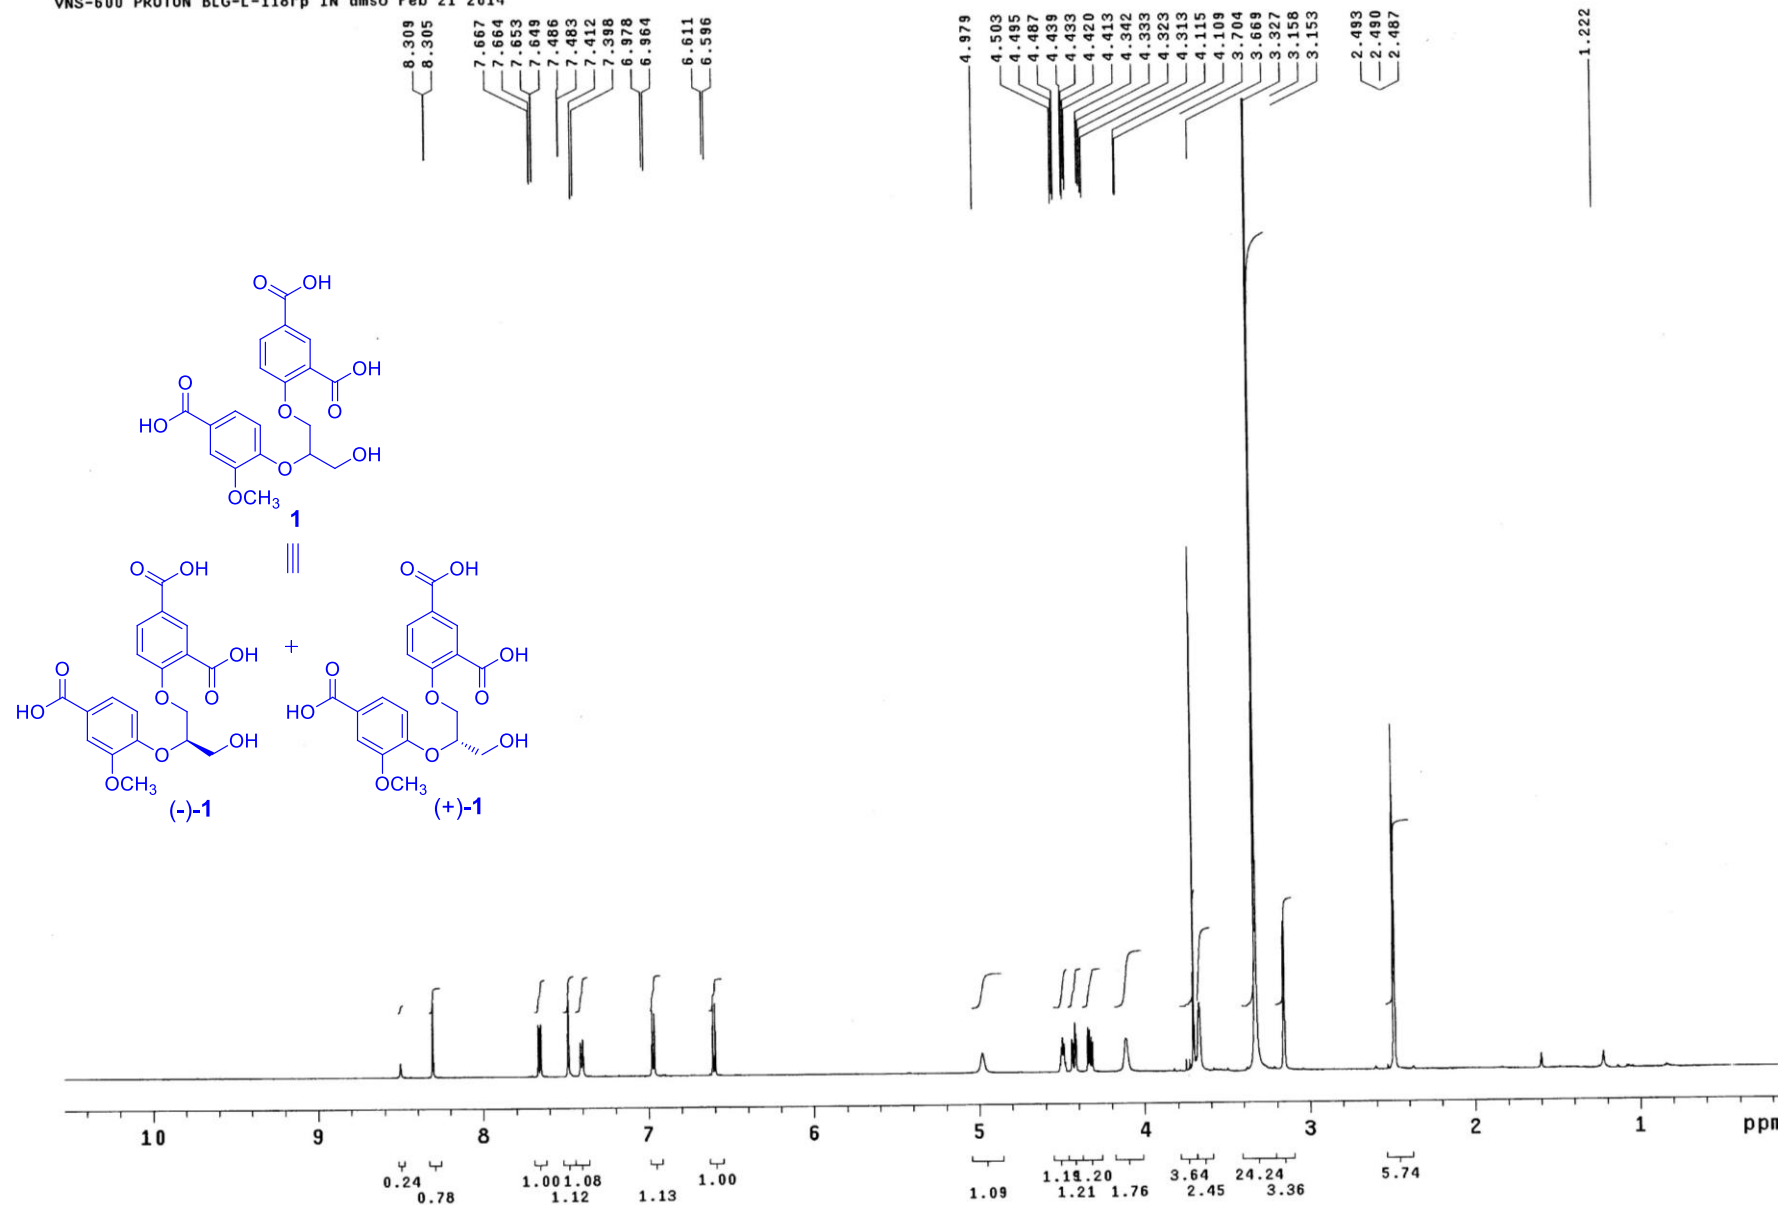

Figure S7. The <sup>1</sup>H NMR spectrum of **1** in DMSO-*d*<sub>6</sub> (600 MHz).

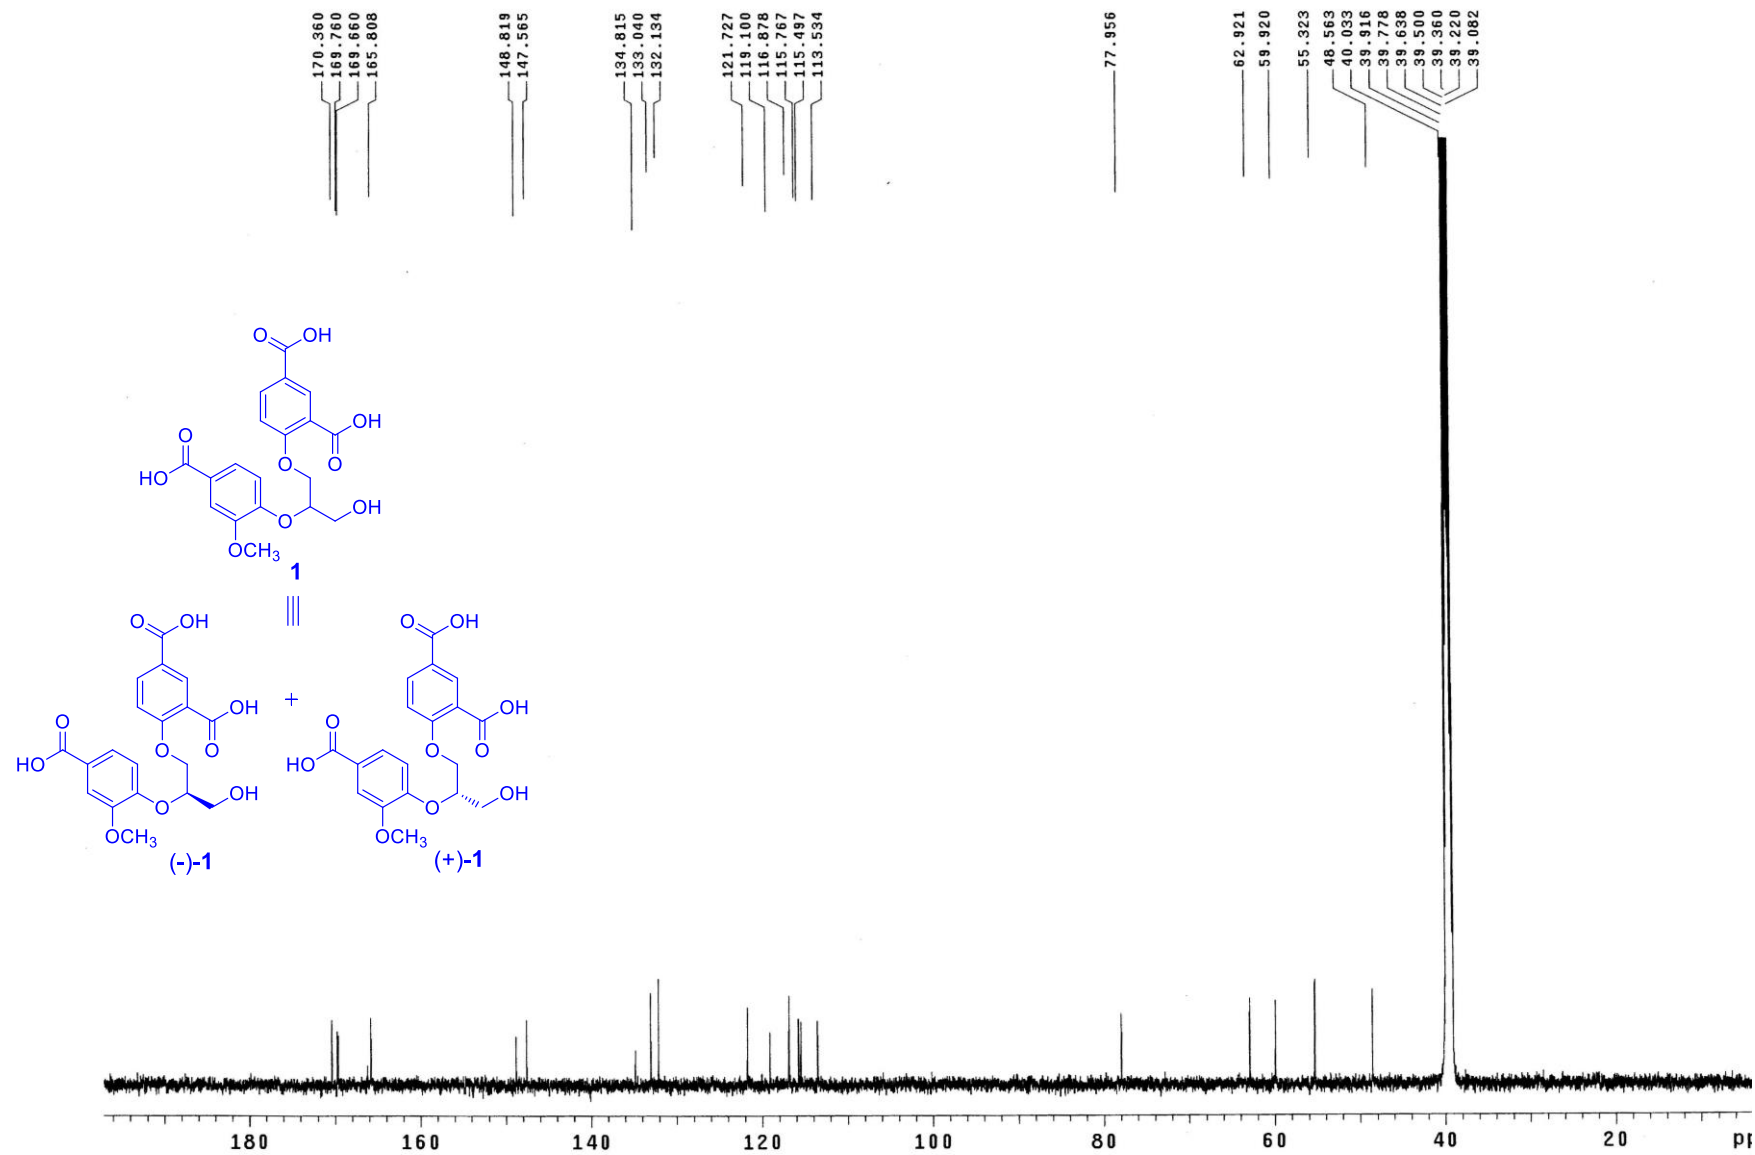

Figure S8. The <sup>13</sup>C NMR spectrum of **1** in DMSO-*d*<sub>6</sub> (150 MHz).

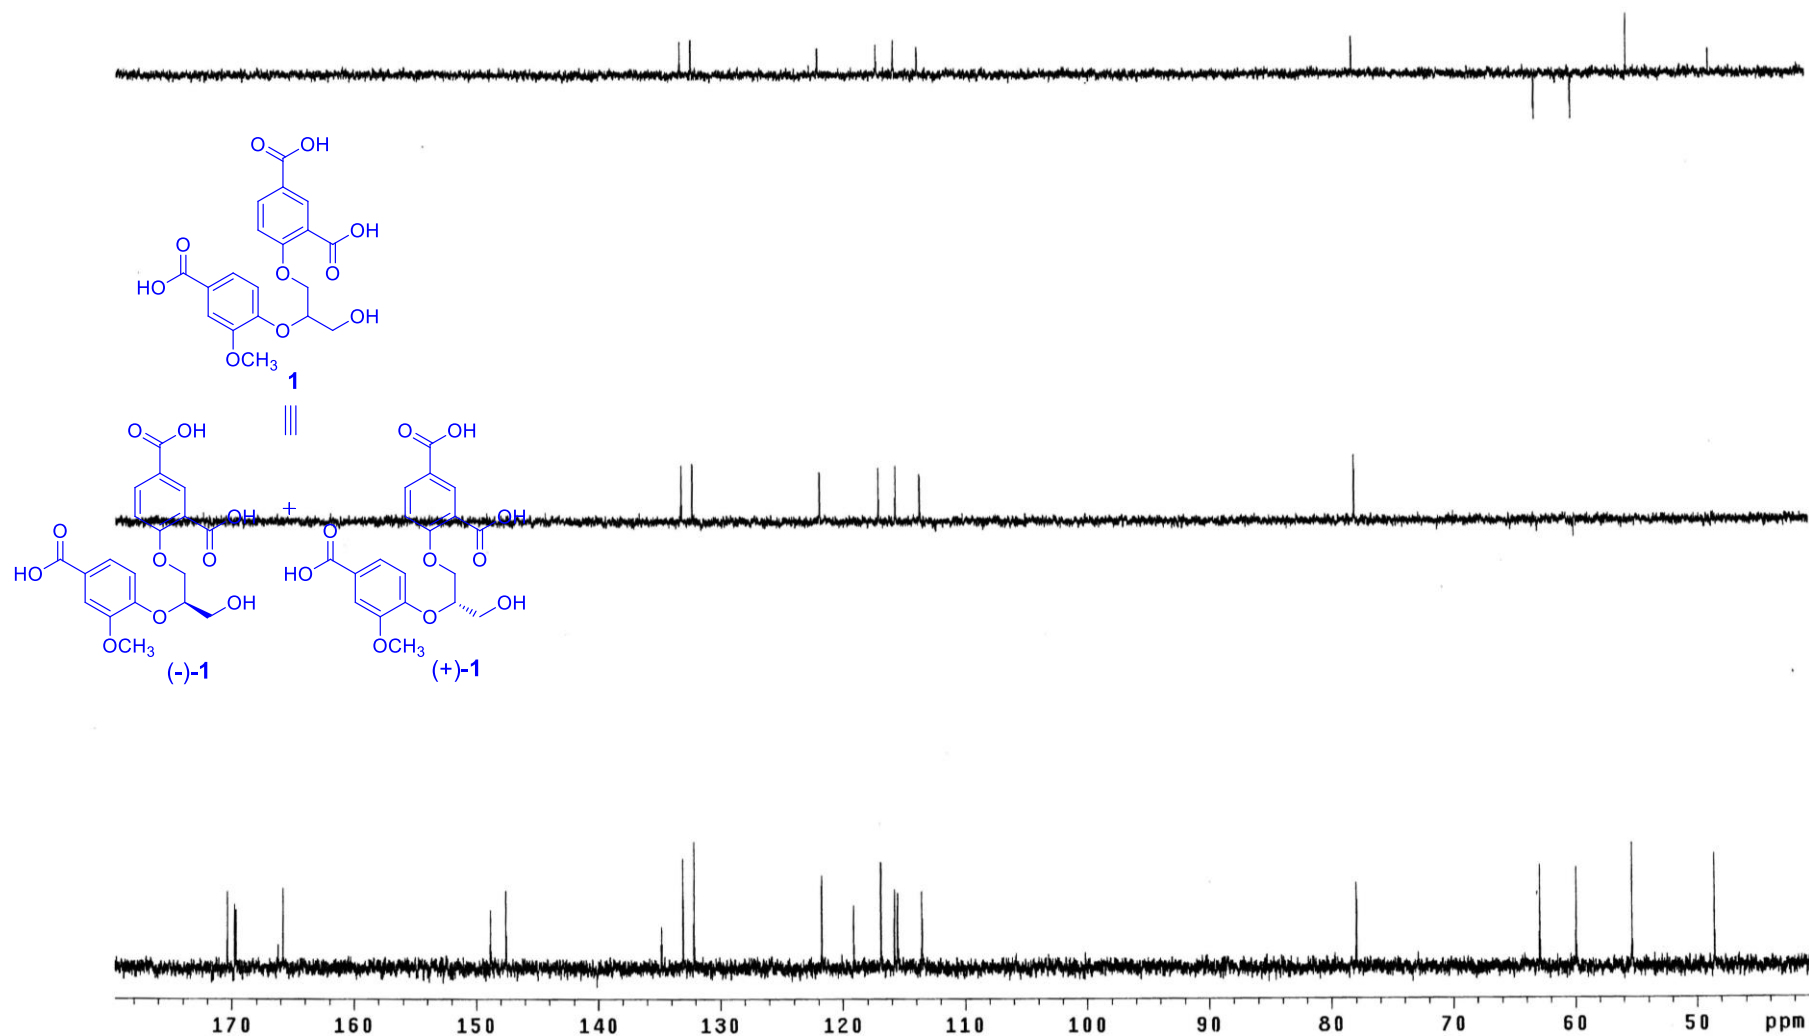

Figure S9. The DEPT spectrum of **1** in DMSO-*d*<sub>6</sub> (150 MHz).

VNS-600 gCOSY BLG-L-118rp IN dms0 May 6 2014

Temp. 25.0 C / 298.1 K  
Sample #12, Operator: vjwalk

Relax. delay 1.000 sec  
Acq. time 0.150 sec  
Width 6443.3 Hz  
2D Width 6443.3 Hz  
2 repetitions  
256 increments  
OBSERVE H1, 599.6905197 MHz  
DATA PROCESSING  
Sq. sine bell 0.075 sec  
F1 DATA PROCESSING  
Sq. sine bell 0.027 sec  
FT size 2048 x 2048  
Total time 10 min

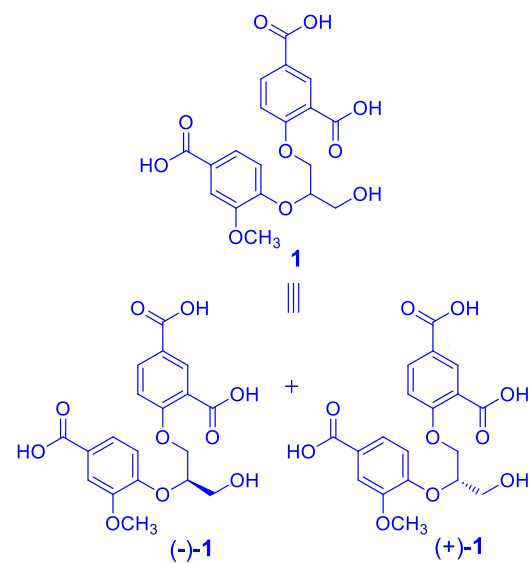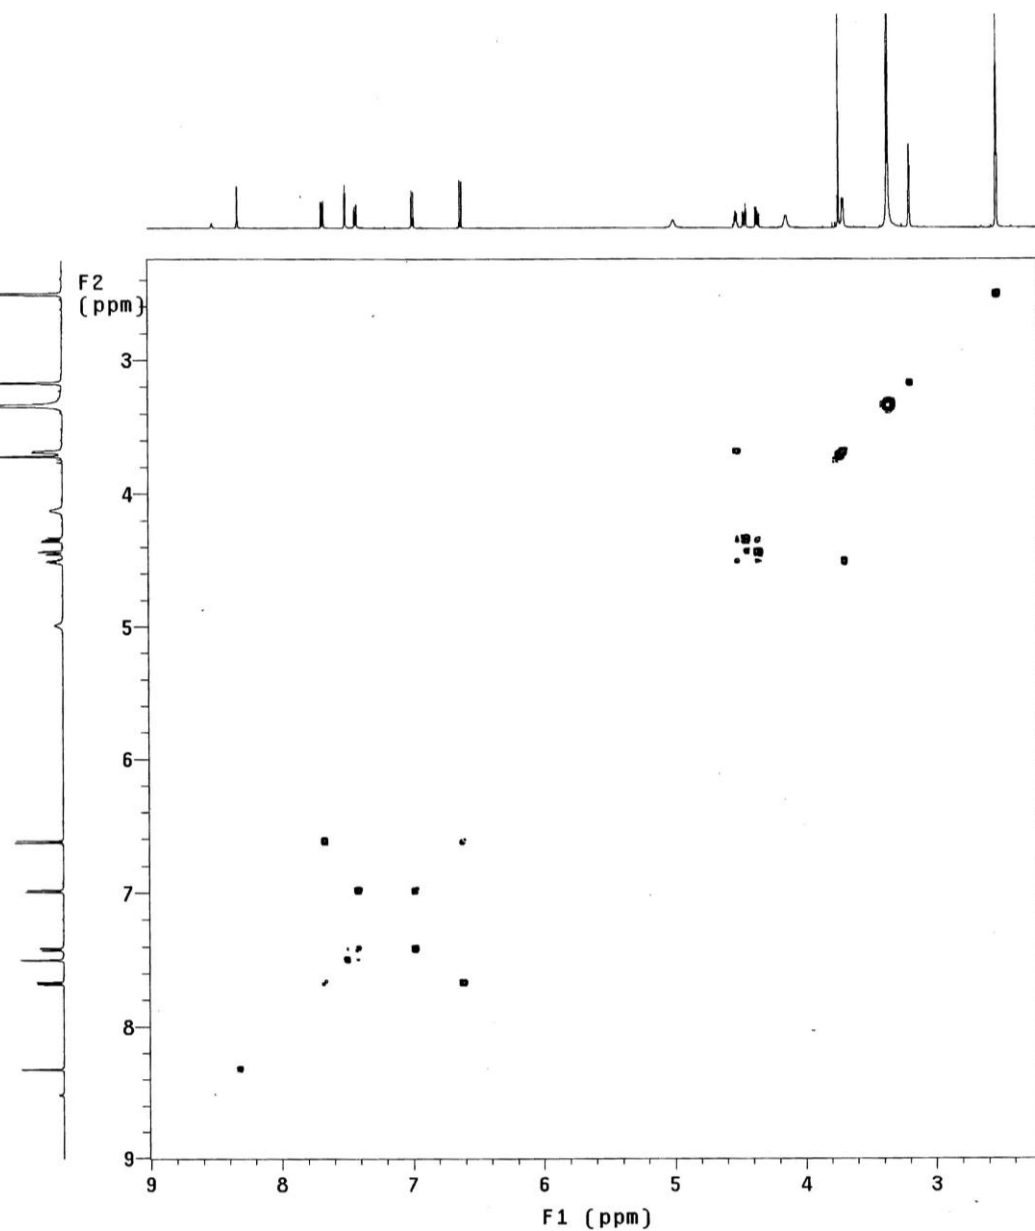

Figure S10. The <sup>1</sup>H-<sup>1</sup>H COSY spectrum of 1 in DMSO-*d*<sub>6</sub> (600 MHz).

Temp. 25.0 C / 298.1 K  
 Sample #12, Operator: vjwalk

Relax. delay 1.000 sec  
 Acq. time 0.150 sec  
 Width 6443.3 Hz  
 2D Width 30154.5 Hz  
 48 repetitions  
 140 increments  
 OBSERVE H1, 599.6905246 MHz  
 DECOUPLE C13, 150.8058756 MHz  
 Power 36 dB  
 on during acquisition  
 off during delay  
 W40\_NEW-SW modulated  
 DATA PROCESSING  
 Sine bell 0.027 sec  
 F1 DATA PROCESSING  
 Sine bell 0.005 sec  
 FT size 4096 x 2048  
 Total time 2 hr, 14 min

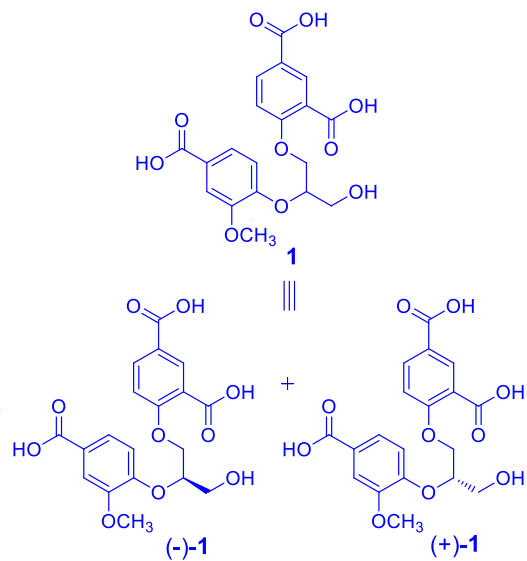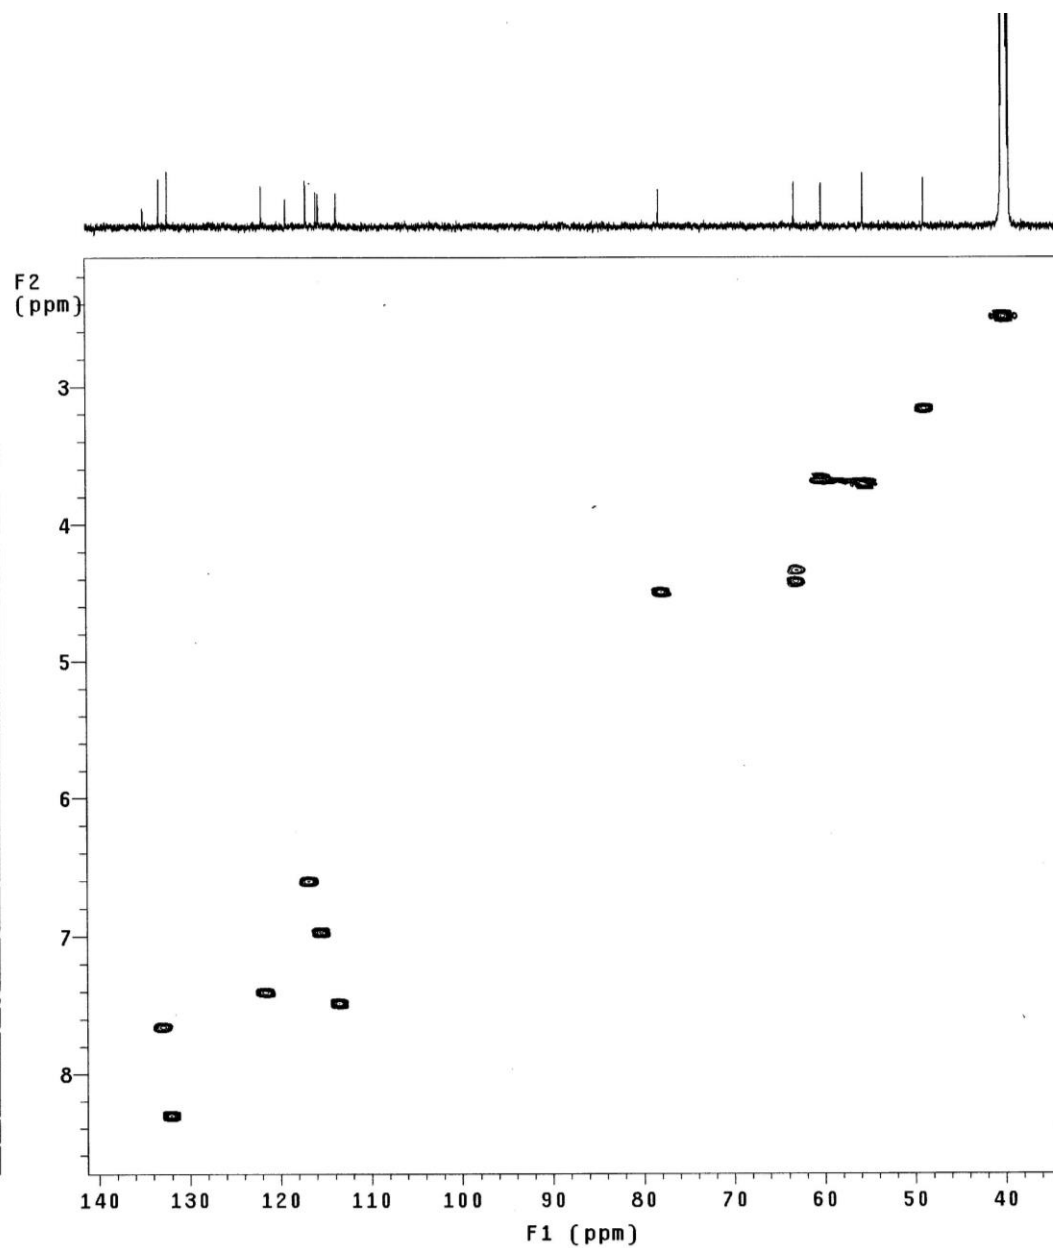

Figure S11. The HSQC spectrum of 1 in DMSO- $d_6$  (600 MHz for  $^1\text{H}$ ).

Temp. 25.0 C / 298.1 K  
Sample #12, Operator: vjwalk

Relax. delay 1.000 sec  
Acq. time 0.150 sec  
Width 6443.3 Hz  
2D Width 36182.7 Hz  
96 repetitions  
2 x 80 increments  
OBSERVE H1, 599.6905190 MHz  
DATA PROCESSING  
Sq. sine bell 0.075 sec  
F1 DATA PROCESSING  
Gauss apodization 0.002 sec  
FT size 4096 x 2048  
Total time 5 hr, 16 min

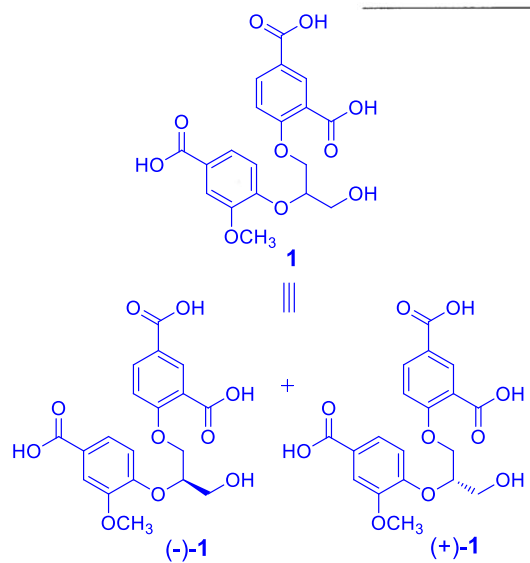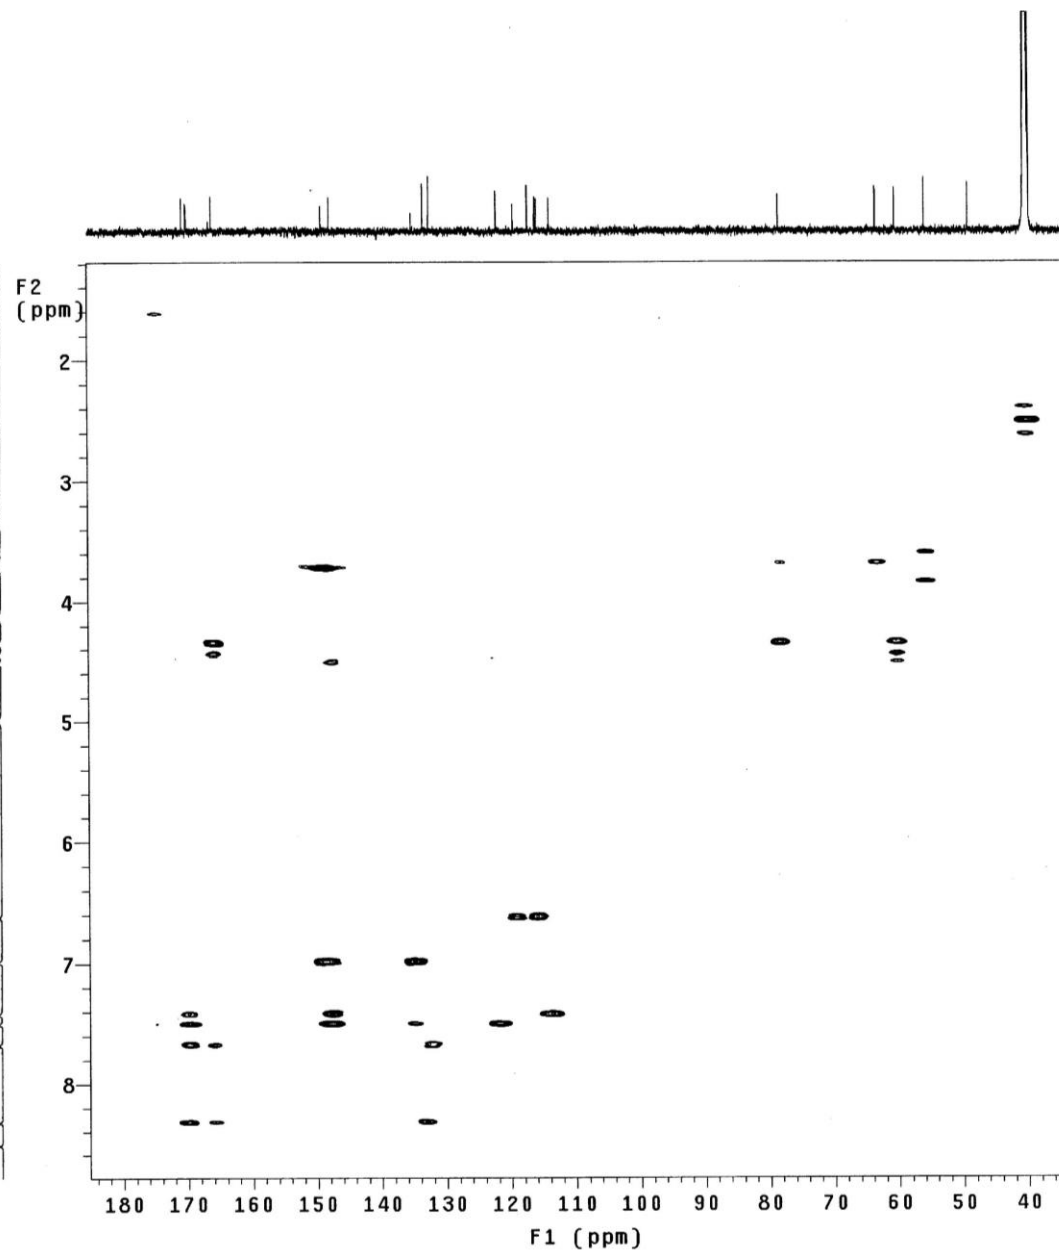

**Figure S12.** The HMBC spectrum of **1** in DMSO-*d*<sub>6</sub> (600 MHz for <sup>1</sup>H).

Data File C:\CHEM32\1\DATA\LYF\20150319000001.D  
 Sample Name: blg-1-118rp

```

-----
Acq. Operator   :
Acq. Instrument : Instrument 1           Location : Vial 1
Injection Date  : 2015-3-19 17:34:03
Acq. Method     : D:\DEF_LC.M
Last changed    : 2015-3-19 17:05:33
                  (modified after loading)
Analysis Method : D:\DEF_LC.M
Last changed    : 2015-3-21 9:47:20
                  (modified after loading)
Sample Info     : ZHENG:YI 4:1 0.1%tfa 1.5ml 210nm
  
```

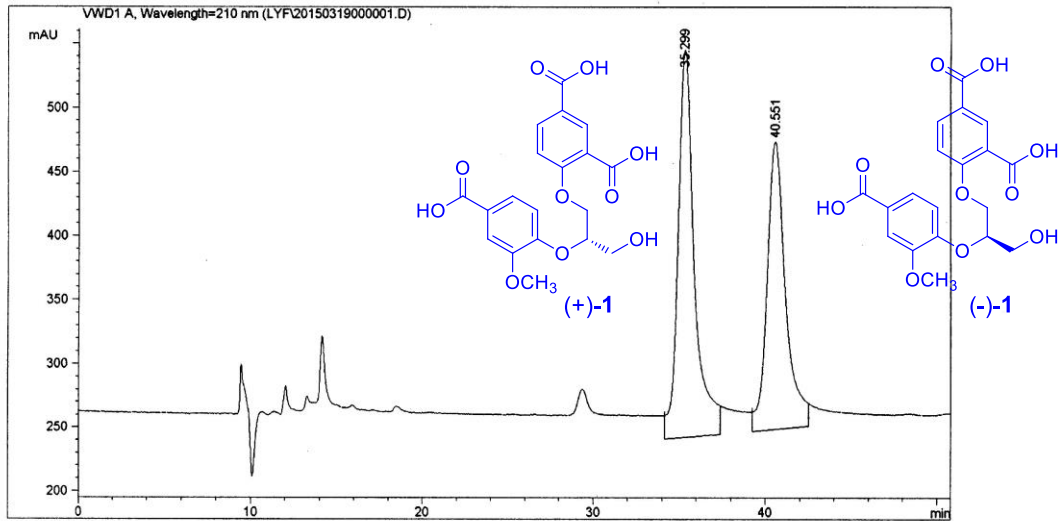

Area Percent Report

```

-----
Sorted By      : Signal
Multiplier     : 1.0000
Dilution       : 1.0000
Use Multiplier & Dilution Factor with ISTDs
  
```

Signal 1: VWD1 A, Wavelength=210 nm

| Peak #   | RetTime [min] | Type | Width [min] | Area mAU*s | Height [mAU] | Area %  |
|----------|---------------|------|-------------|------------|--------------|---------|
| 1        | 35.299        | VV   | 0.9215      | 2.00012e4  | 303.01370    | 54.2378 |
| 2        | 40.551        | VV   | 0.9077      | 1.68756e4  | 224.83284    | 45.7622 |
| Totals : |               |      |             | 3.68768e4  | 527.84654    |         |

\*\*\* End of Report \*\*\*

**Figure S13.** The HPLC chromatogram of **1** on Chiralpak AD-H column [5  $\mu$ m, 250  $\times$  10 mm; Flow rate: 1.5 mL/min; mobile phase: iPrOH:n-hexane mixture (4:1, containing 0.1% TFA, v/v/v); temperature 23°C].

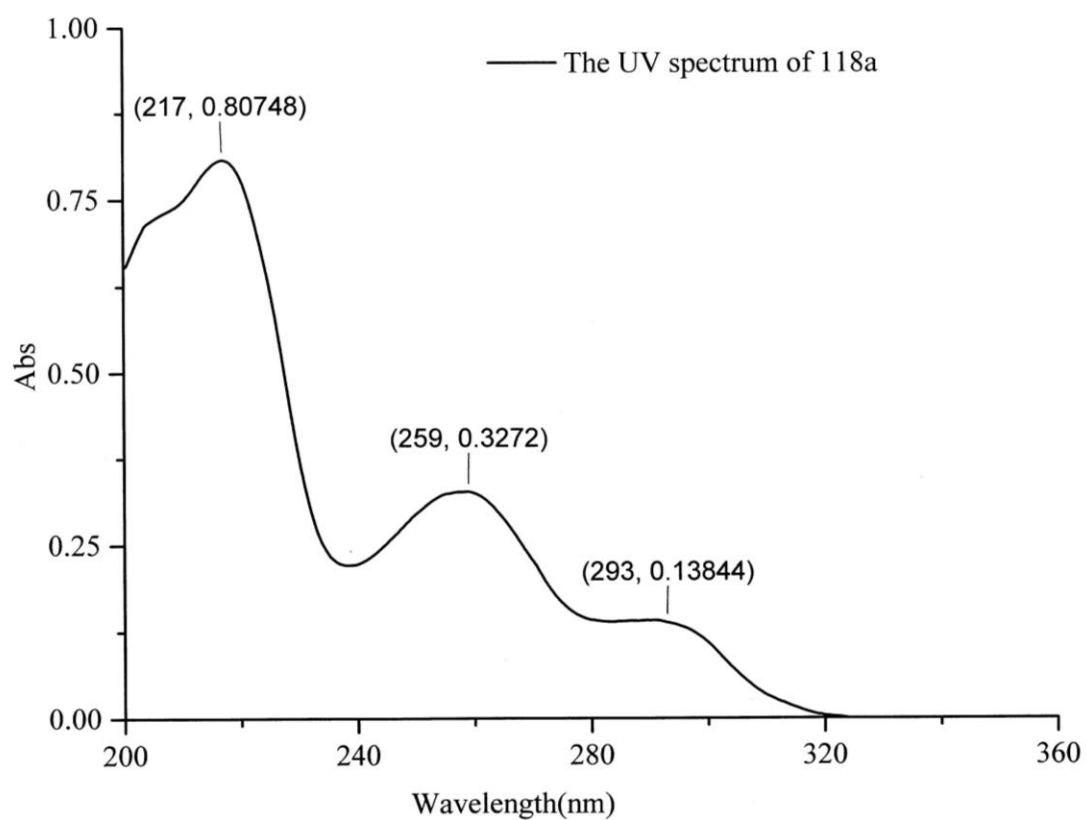

**Figure S14.** The UV spectrum of compound (–)-**1** in MeOH



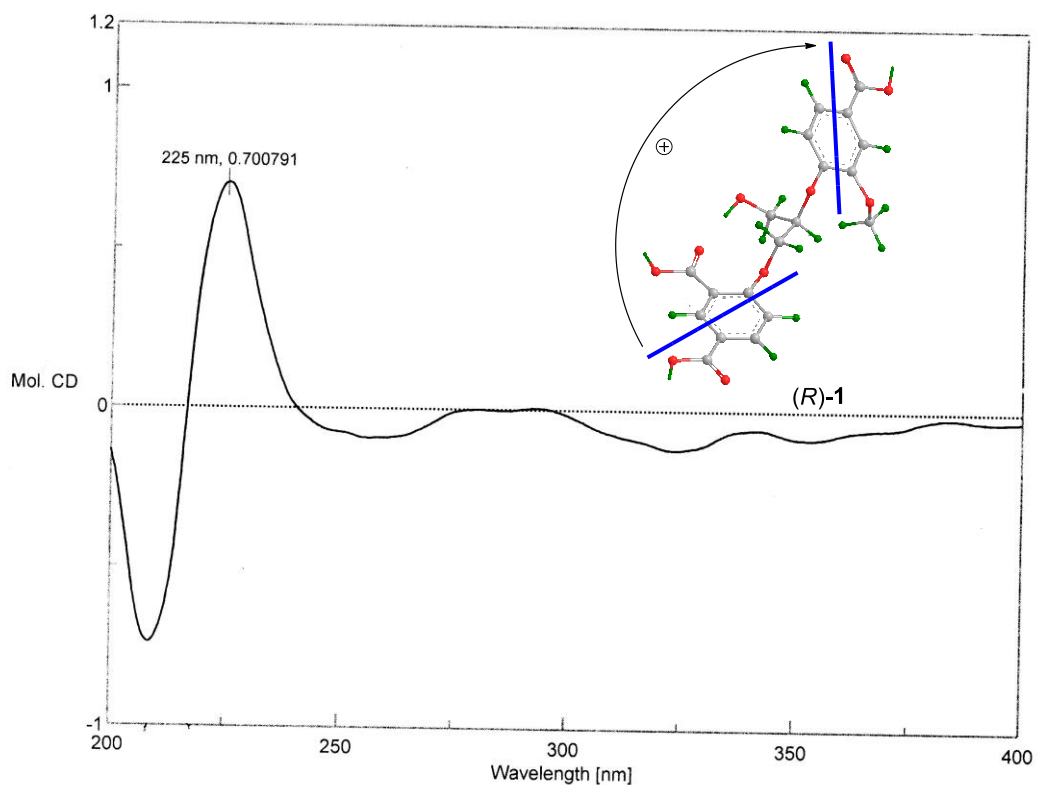

[Comments]  
 Sample name BLG-118a  
 Comment  
 User  
 Division  
 Company dell

[Measurement Information]  
 Instrument Name J-815  
 Model Name J-815  
 Serial No. A024461168

Accessory Standard  
 Accessory S/N A024461168  
 Cell Length 1 mm

Photometric Mode CD, HT, Abs  
 Measure Range 400 - 200 nm  
 Data pitch 0.5 nm  
 Sensitivity Standard  
 D.I.T. 1 sec  
 Band width 2.00 nm  
 Start Mode Immediately  
 Scanning Speed 200 nm/min  
 Baseline Correction Baseline  
 Shutter Control Auto  
 PMT Voltage Auto  
 Accumulations 2  
 Solvent MEOH  
 Concentration 0.3 (w/v)%

[Detailed Information]  
 Creation date 2015-4-1 17:27

Data array type Linear data array \* 3  
 Horizontal axis Wavelength [nm]  
 Vertical axis(1) Mol. CD  
 Vertical axis(2) HT [V]  
 Vertical axis(3) Abs  
 Start 400 nm  
 End 200 nm  
 Data interval 0.5 nm  
 Data points 401

**Figure S15.** The CD spectrum of (–)-1 in MeOH.

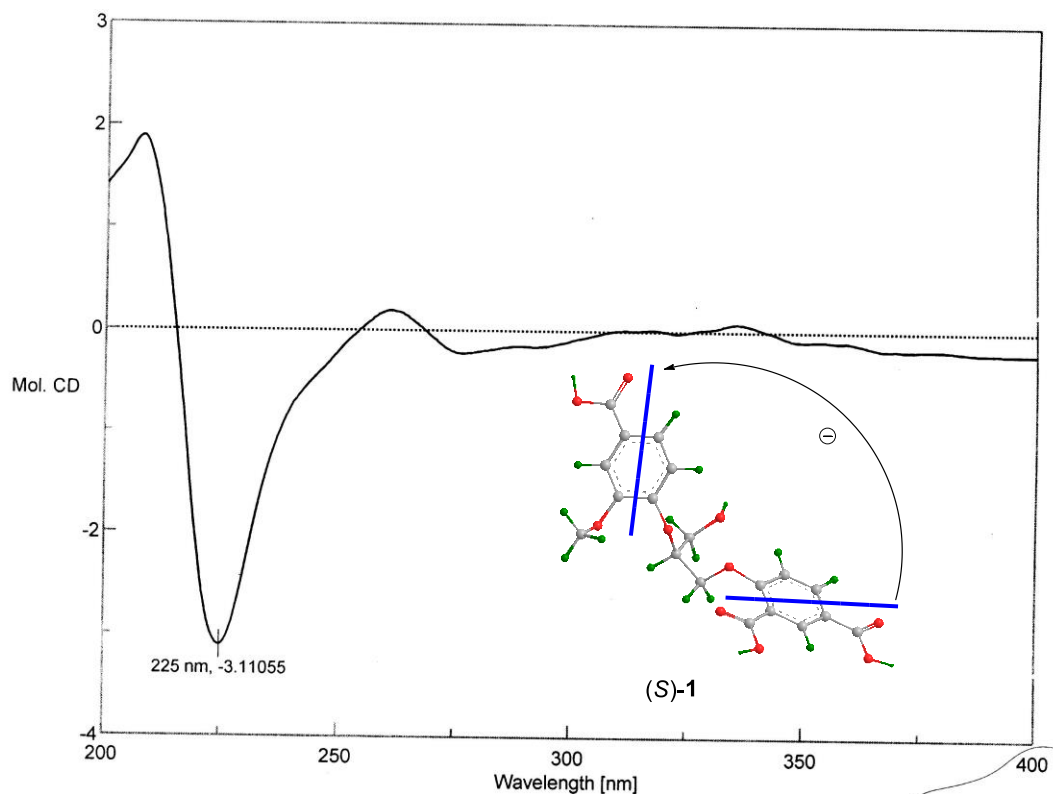

[Comments]  
 Sample name BLG-L-118b  
 Comment  
 User  
 Division  
 Company dell

[Measurement Information]  
 Instrument Name J-815  
 Model Name J-815  
 Serial No. A024461168

Accessory Standard  
 Accessory S/N A024461168  
 Cell Length 1 mm

Photometric Mode CD, HT, Abs  
 Measure Range 400 - 200 nm  
 Data pitch 0.5 nm  
 Sensitivity Standard  
 D.I.T. 1 sec  
 Band width 2.00 nm  
 Start Mode Immediately  
 Scanning Speed 200 nm/min  
 Baseline Correction Baseline  
 Shutter Control Auto  
 PMT Voltage Auto  
 Accumulations 2  
 Solvent MEOH  
 Concentration 0.123 (w/v)%

[Detailed Information]  
 Creation date 2015-4-1 17:25  
 Data array type Linear data array \* 3  
 Horizontal axis Wavelength [nm]  
 Vertical axis(1) Mol. CD  
 Vertical axis(2) HT [V]  
 Vertical axis(3) Abs  
 Start 400 nm  
 End 200 nm  
 Data interval 0.5 nm  
 Data points 401

Figure S16. The CD spectrum of compound (+)-1 in MeOH.

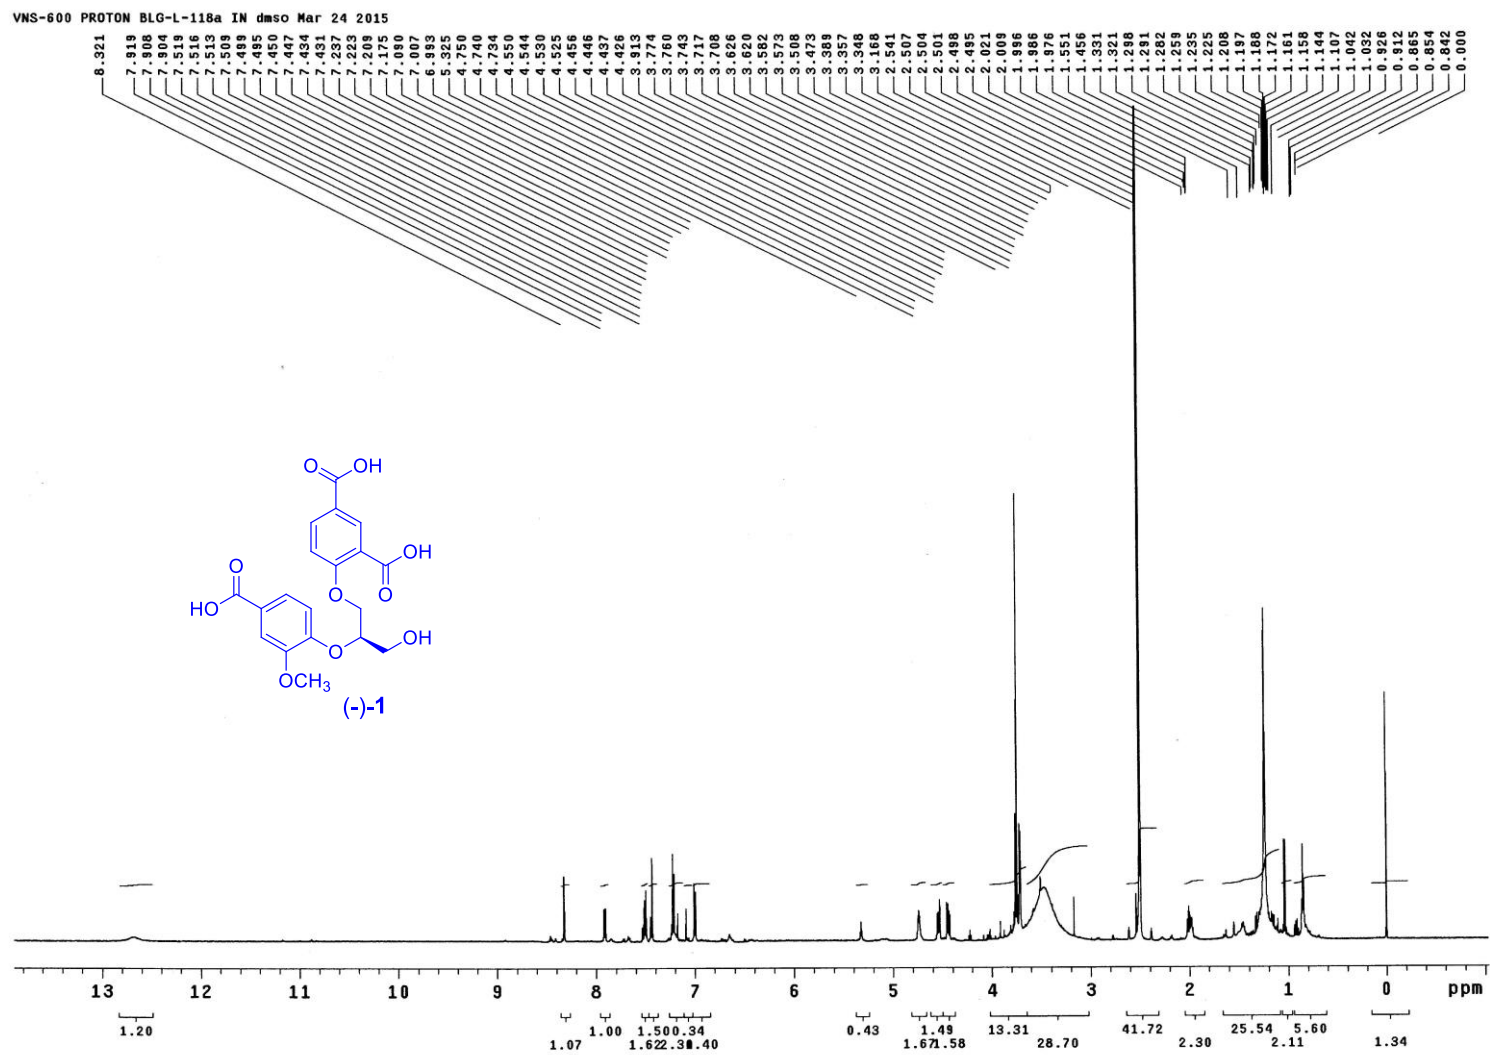

Figure S17. The  $^1\text{H}$  NMR spectrum of compound (-)-1 in  $\text{DMSO-}d_6$  (600 MHz).

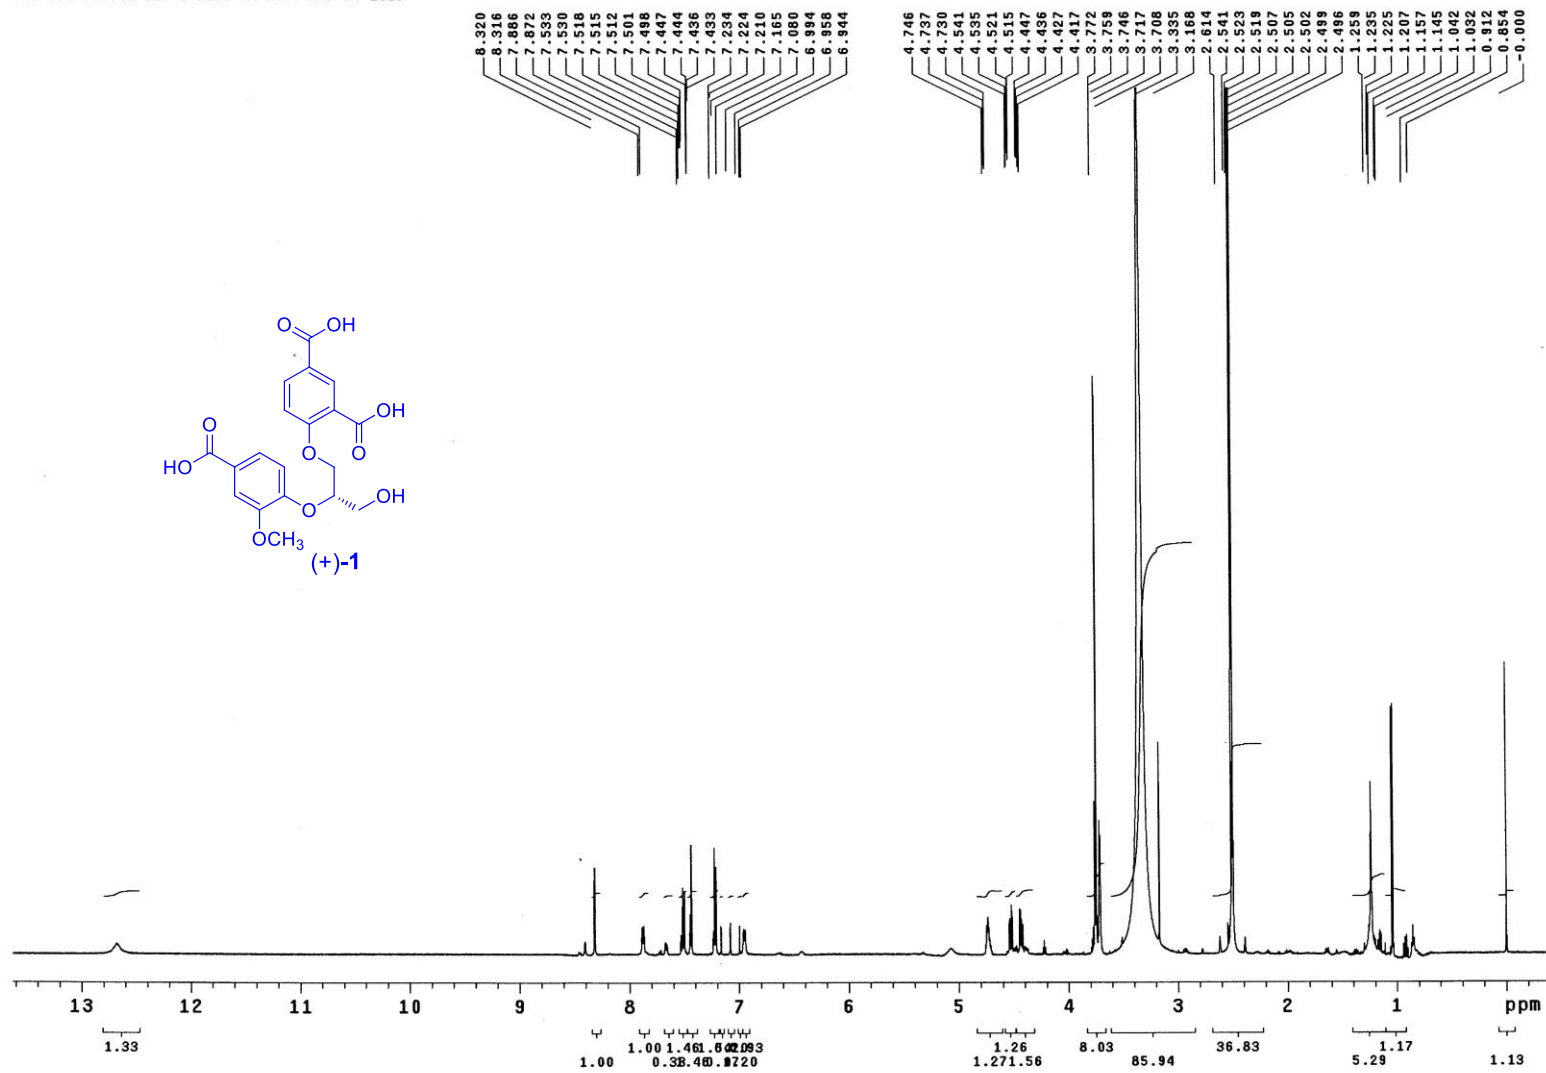

**Figure S18.** The <sup>1</sup>H NMR spectrum of compound (+)-1 in DMSO-d<sub>6</sub> (600 MHz).

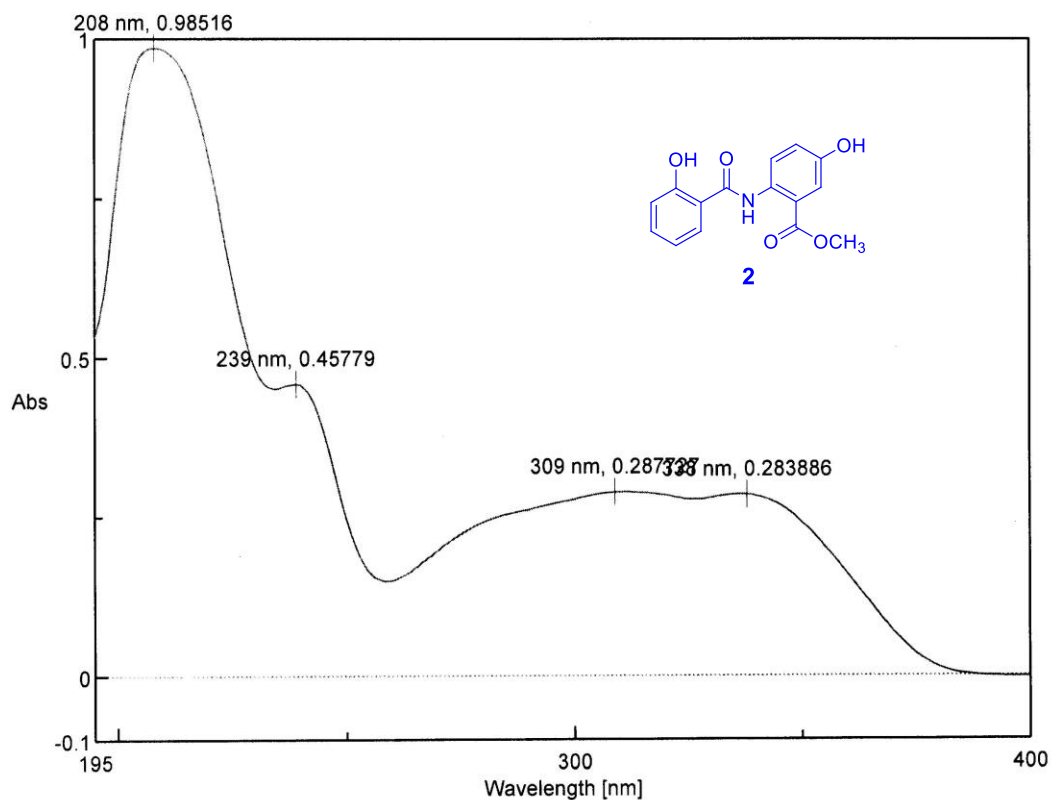

|                           |                   |                    |
|---------------------------|-------------------|--------------------|
| [Comment]                 |                   | CI-12-2-W          |
| Sample Name               | CI-12             |                    |
| Comment                   |                   |                    |
| User                      |                   |                    |
| Division                  |                   |                    |
| Company                   | 324               |                    |
| [Measurement Information] |                   |                    |
| Instrument Name           | V-650             |                    |
| Model Name                | V-650             |                    |
| Serial No.                | A034461150        |                    |
| Accessory                 | PSC-718           | [Data Information] |
| Accessory S/N             | A001761114        | Creation Date      |
| Position                  | 1                 | 2011-9-14 16:13    |
| Cell Length               | 10 mm             | Data array type    |
| Temperature               | 19.94 C           | Linear data array  |
| Control Sensor            | Holder            | Horizontal         |
| Monitor Sensor            | Holder            | Wavelength [nm]    |
| Start Mode                | Start immediately | Vertical           |
|                           |                   | Abs                |
|                           |                   | Start              |
|                           |                   | 400 nm             |
|                           |                   | End                |
|                           |                   | 195 nm             |
|                           |                   | Data pitch         |
|                           |                   | 1 nm               |
|                           |                   | Data points        |
|                           |                   | 206                |
| Photometric Mode          | Abs               |                    |
| Measurement range         | 400 - 195 nm      |                    |
| Data pitch                | 1 nm              |                    |
| Band width(UV/Vis)        | 1.0 nm            |                    |
| Response                  | Medium            |                    |
| Scanning speed            | 200 nm/min        |                    |
| Source Change             | 340 nm            |                    |
| Light Source              | D2/MI             |                    |
| Filter Exchange           | Step              |                    |
| Correction                | Baseline          |                    |

**Figure S19.** The UV spectrum of compound **2** in MeOH.

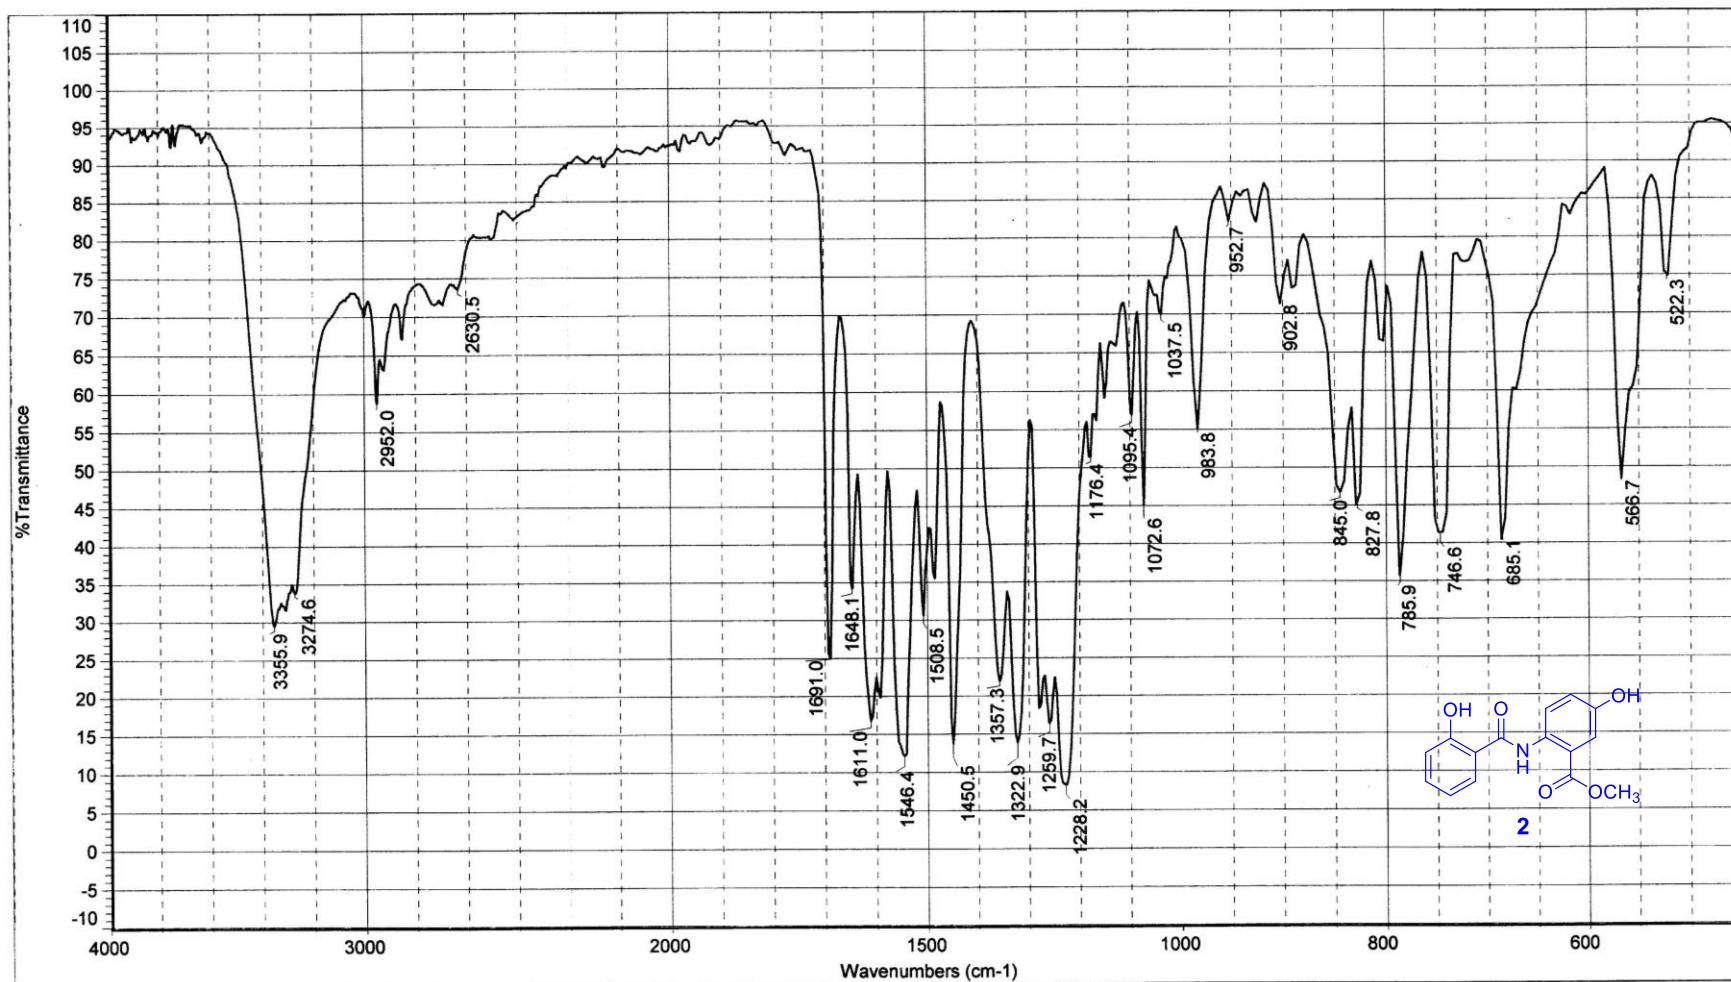

日期: 星期三 5月 18 13:26:42 2011 (GMT+08:00) Sample Name: CI - 12 (显微镜透射法FT- IR Microscope Transmission)

扫描次数: 100

傅里叶变换红外显微镜(FT-IR Microscope): Centaurus

分辨率: 8.000

美国热电公司(Thermo)傅里叶变换红外光谱仪:Nicolet 5700

Figure S20. The IR spectrum of compound 2.

# Display Report - Selected Window Selected Analysis

**Analysis Name:** chenmh07.d  
**Method:** TEST.MS  
**Sample Name:** CI-12  
**Analysis Info:**

**Instrument:** LC-MSD-Trap-SL  
**Operator:** Operator

**Print Date:** 6/30/2010 12:49:50 PM  
**Acq. Date:** 6/30/2010 12:41:48 PM

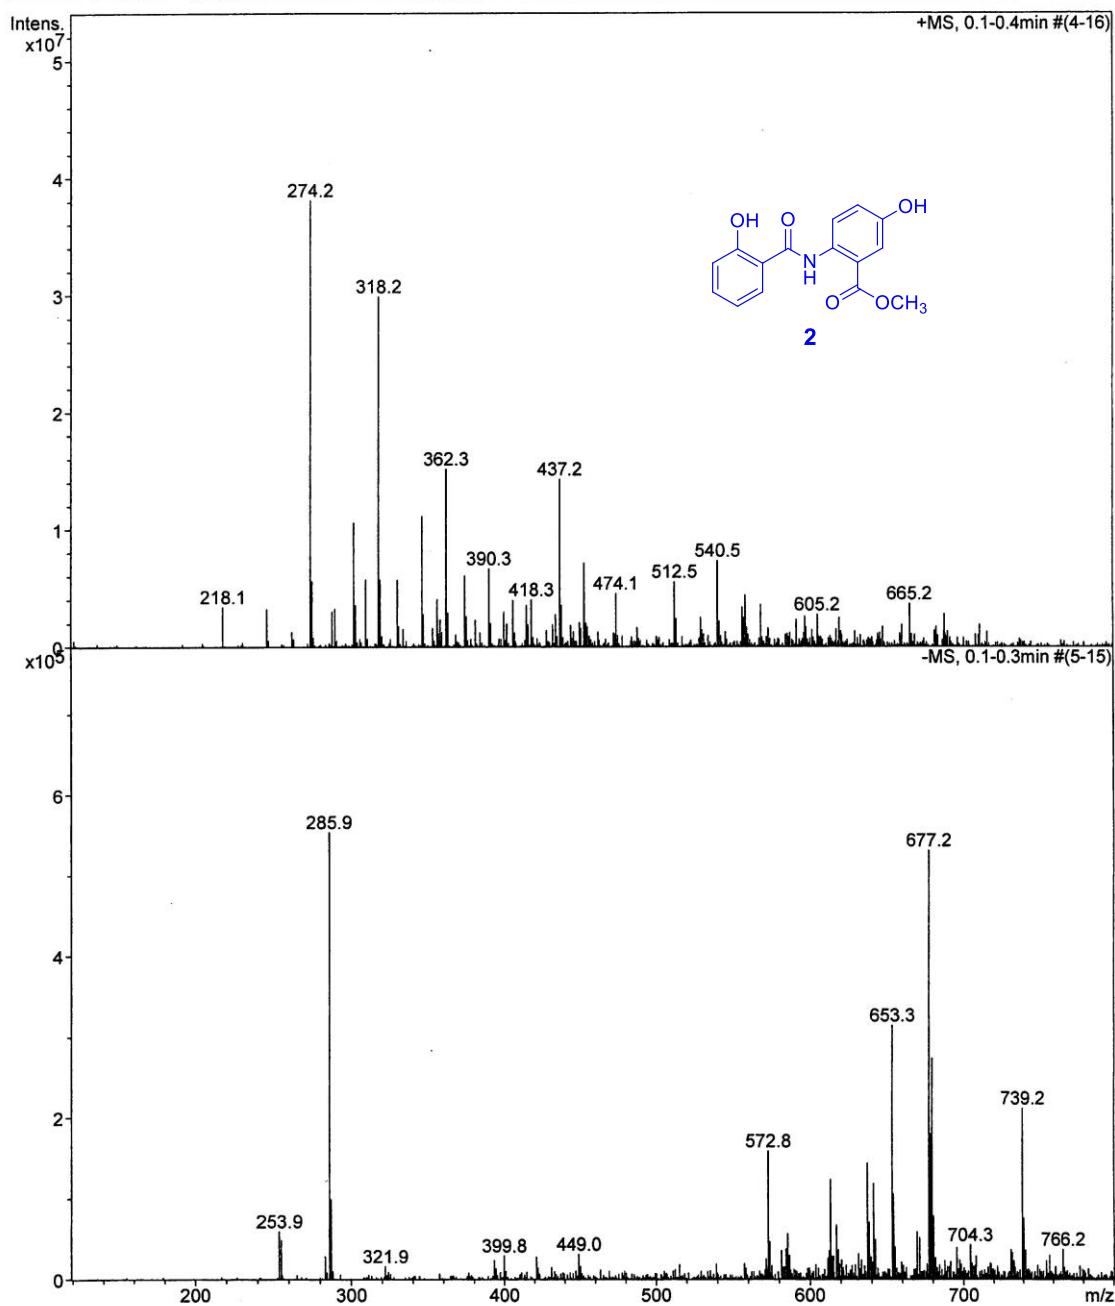

Figure S21. The ESIMS report of compound 2.

# Qualitative Analysis Report

|                 |              |                        |            |
|-----------------|--------------|------------------------|------------|
| Data Filename   | 201107196.d  | Sample Name            | CI-12      |
| Sample Type     | Sample       | Position               | P1-C7      |
| Instrument Name | Instrument 1 | User Name              |            |
| Acq Method      |              | IRM Calibration Status | XXXXXXXXXX |
| DA Method       | TEST LCMS.m  | Comment                |            |

## User Chromatograms

Fragmentor Voltage 135    Collision Energy 0    Ionization Mode ESI

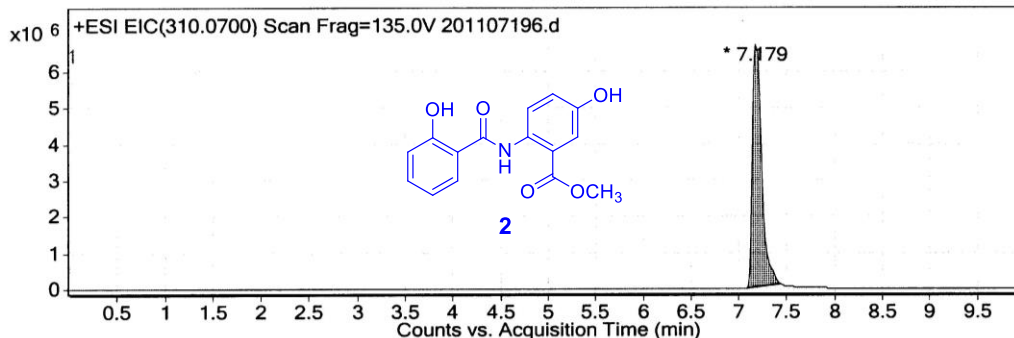

### Integration Peak List

| Peak | Start | RT    | End   | Height  | Area     | Area % |
|------|-------|-------|-------|---------|----------|--------|
| 1    | 7.083 | 7.179 | 7.436 | 6688542 | 43970364 | 100    |

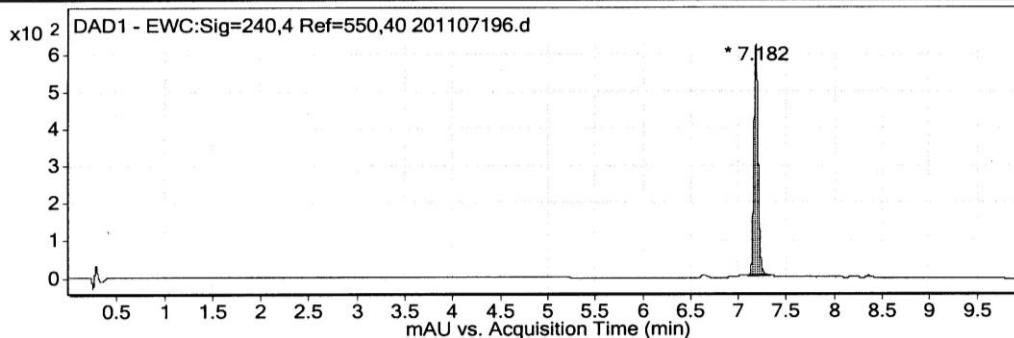

### Integration Peak List

| Peak | Start | RT    | End   | Height | Area     | Area % |
|------|-------|-------|-------|--------|----------|--------|
| 1    | 7.089 | 7.182 | 7.337 | 621.4  | 1971.465 | 100    |

## User Spectra

Fragmentor Voltage 135    Collision Energy 0    Ionization Mode ESI

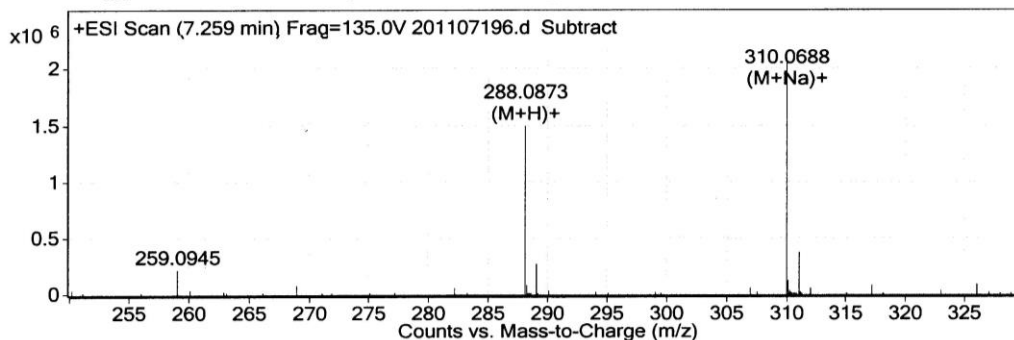

Figure S22. The (+)-HRESIMS report of compound 2, page 1.



## Qualitative Analysis Report

### Peak List

| m/z      | z | Abund   | Formula         | Ion     |
|----------|---|---------|-----------------|---------|
| 104.9927 |   | 223506  |                 |         |
| 186.9955 |   | 128728  |                 |         |
| 259.0945 |   | 218619  |                 |         |
| 288.0873 | 1 | 1499513 | C15 H14 N O5    | (M+H)+  |
| 289.0907 | 1 | 272132  | C15 H14 N O5    | (M+H)+  |
| 310.0688 | 1 | 2091716 | C15 H13 N Na O5 | (M+Na)+ |
| 310.2213 |   | 126911  |                 |         |
| 311.0727 | 1 | 377445  | C15 H13 N Na O5 | (M+Na)+ |
| 450.6009 |   | 110671  |                 |         |

### Formula Calculator Element Limits

| Element | Min | Max |
|---------|-----|-----|
| C       | 3   | 100 |
| H       | 0   | 120 |
| O       | 0   | 30  |
| N       | 0   | 5   |
| S       | 0   | 5   |
| Cl      | 0   | 0   |

### Formula Calculator Results

| Formula         | Best | Mass     | Tgt Mass | Diff (ppm) | Ion Species        | Score |
|-----------------|------|----------|----------|------------|--------------------|-------|
| C15 H13 N O5    | TRUE | 287.0796 | 287.0794 | -0.84      | C15 H13 N Na O5    | 99.92 |
| C16 H9 N5 O     |      | 287.0796 | 287.0807 | 3.81       | C16 H9 N5 Na O     | 99.65 |
| C19 H13 N S     |      | 287.0796 | 287.0769 | -9.56      | C19 H13 N Na S     | 97.78 |
| C16 H17 N S2    |      | 287.0796 | 287.0802 | 2.18       | C16 H17 N Na S2    | 97.22 |
| C7 H17 N3 O7 S  |      | 287.0796 | 287.0787 | -3.13      | C7 H17 N3 Na O7 S  | 96.12 |
| C8 H21 N3 O2 S3 |      | 287.0796 | 287.0796 | -0.11      | C8 H21 N3 Na O2 S3 | 92.63 |
| C15 H13 N O5    | TRUE | 287.0801 | 287.0794 | -2.37      | C15 H14 N O5       | 99.86 |
| C16 H9 N5 O     |      | 287.0801 | 287.0807 | 2.28       | C16 H10 N5 O       | 99.83 |
| C16 H17 N S2    |      | 287.0801 | 287.0802 | 0.65       | C16 H18 N S2       | 97.22 |
| C12 H17 N O5 S  |      | 287.0801 | 287.0827 | 9.36       | C12 H18 N O5 S     | 97.2  |
| C7 H17 N3 O7 S  |      | 287.0801 | 287.0787 | -4.66      | C7 H18 N3 O7 S     | 95.89 |
| C8 H21 N3 O2 S3 |      | 287.0801 | 287.0796 | -1.64      | C8 H22 N3 O2 S3    | 92.51 |

--- End Of Report ---

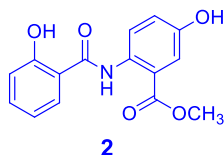

**Figure S23.** The (+)-HRESIMS report of compound **2**, page 2.

MS Formula Results: + Scan (7.259 min) Sub (201107196.d)

| m/z                                 | Ion                 | Formula            | Abundance       |              |                |             |                  |                   |                       |                    |                    |                   |            |            |
|-------------------------------------|---------------------|--------------------|-----------------|--------------|----------------|-------------|------------------|-------------------|-----------------------|--------------------|--------------------|-------------------|------------|------------|
| 288.0873                            | (M+H) <sup>+</sup>  | C15 H14 N O5       | 1499512.5       |              |                |             |                  |                   |                       |                    |                    |                   |            |            |
| <b>Best</b>                         | <b>Formula (M)</b>  | <b>Ion Formula</b> | <b>Calc m/z</b> | <b>Score</b> | <b>Cross S</b> | <b>Mass</b> | <b>Calc Mass</b> | <b>Diff (ppm)</b> | <b>Abs Diff (ppm)</b> | <b>Abund Match</b> | <b>Spacing Mat</b> | <b>Mass Match</b> | <b>m/z</b> | <b>DBE</b> |
| <input checked="" type="checkbox"/> | C15 H13 N O5        | C15 H14 N O5       | 288.0866        | 99.96        |                | 287.0801    | 287.0794         | -2.37             | 2.37                  | 99.8               | 100                | 99.83             | 288.0873   | 10         |
| <input type="checkbox"/>            | C16 H9 N5 O         | C16 H10 N5 O       | 288.088         | 99.83        |                | 287.0801    | 287.0807         | 2.28              | 2.28                  | 99.77              | 99.9               | 99.84             | 288.0873   | 15         |
| <input type="checkbox"/>            | C16 H17 N S2        | C16 H18 N S2       | 288.0875        | 97.22        |                | 287.0801    | 287.0802         | 0.65              | 0.65                  | 90.78              | 99.43              | 99.99             | 288.0873   | 9          |
| <input type="checkbox"/>            | C12 H17 N O5 S      | C12 H18 N O5 S     | 288.09          | 97.2         |                | 287.0801    | 287.0827         | 9.36              | 9.36                  | 94.96              | 99.59              | 97.35             | 288.0873   | 5          |
| <input type="checkbox"/>            | C7 H17 N3 O7 S      | C7 H18 N3 O7 S     | 288.086         | 95.89        |                | 287.0801    | 287.0787         | -4.66             | 4.66                  | 87.28              | 99.33              | 99.34             | 288.0873   | 1          |
| <input type="checkbox"/>            | C8 H21 N3 O2 S3     | C8 H22 N3 O2 S3    | 288.0869        | 92.51        |                | 287.0801    | 287.0796         | -1.64             | 1.64                  | 74.87              | 98.87              | 99.92             | 288.0873   | 0          |
| m/z                                 | Ion                 | Formula            | Abundance       |              |                |             |                  |                   |                       |                    |                    |                   |            |            |
| 310.0688                            | (M+Na) <sup>+</sup> | C15 H13 N Na O5    | 2091715.9       |              |                |             |                  |                   |                       |                    |                    |                   |            |            |
| <b>Best</b>                         | <b>Formula (M)</b>  | <b>Ion Formula</b> | <b>Calc m/z</b> | <b>Score</b> | <b>Cross S</b> | <b>Mass</b> | <b>Calc Mass</b> | <b>Diff (ppm)</b> | <b>Abs Diff (ppm)</b> | <b>Abund Match</b> | <b>Spacing Mat</b> | <b>Mass Match</b> | <b>m/z</b> | <b>DBE</b> |
| <input checked="" type="checkbox"/> | C15 H13 N O5        | C15 H13 N Na O5    | 310.0686        | 99.92        |                | 287.0796    | 287.0794         | -0.84             | 0.84                  | 99.85              | 99.89              | 99.98             | 310.0688   | 10         |
| <input type="checkbox"/>            | C16 H9 N5 O         | C16 H9 N5 Na O     | 310.0699        | 99.65        |                | 287.0796    | 287.0807         | 3.81              | 3.81                  | 99.7               | 99.66              | 99.61             | 310.0688   | 15         |
| <input type="checkbox"/>            | C19 H13 N S         | C19 H13 N Na S     | 310.0661        | 97.78        |                | 287.0796    | 287.0769         | -9.56             | 9.56                  | 96.73              | 99.48              | 97.57             | 310.0688   | 14         |
| <input type="checkbox"/>            | C16 H17 N S2        | C16 H17 N Na S2    | 310.0695        | 97.22        |                | 287.0796    | 287.0802         | 2.18              | 2.18                  | 91.19              | 99.17              | 99.87             | 310.0688   | 9          |
| <input type="checkbox"/>            | C7 H17 N3 O7 S      | C7 H17 N3 Na O7 S  | 310.0679        | 96.12        |                | 287.0796    | 287.0787         | -3.13             | 3.13                  | 87.74              | 98.94              | 99.74             | 310.0688   | 1          |
| <input type="checkbox"/>            | C8 H21 N3 O2 S3     | C8 H21 N3 Na O2 S3 | 310.0688        | 92.63        |                | 287.0796    | 287.0796         | -0.11             | 0.11                  | 75.53              | 98.41              | 100               | 310.0688   | 0          |

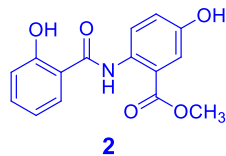

Figure S24. The (+)-HRESIMS report of compound 2, page 3.

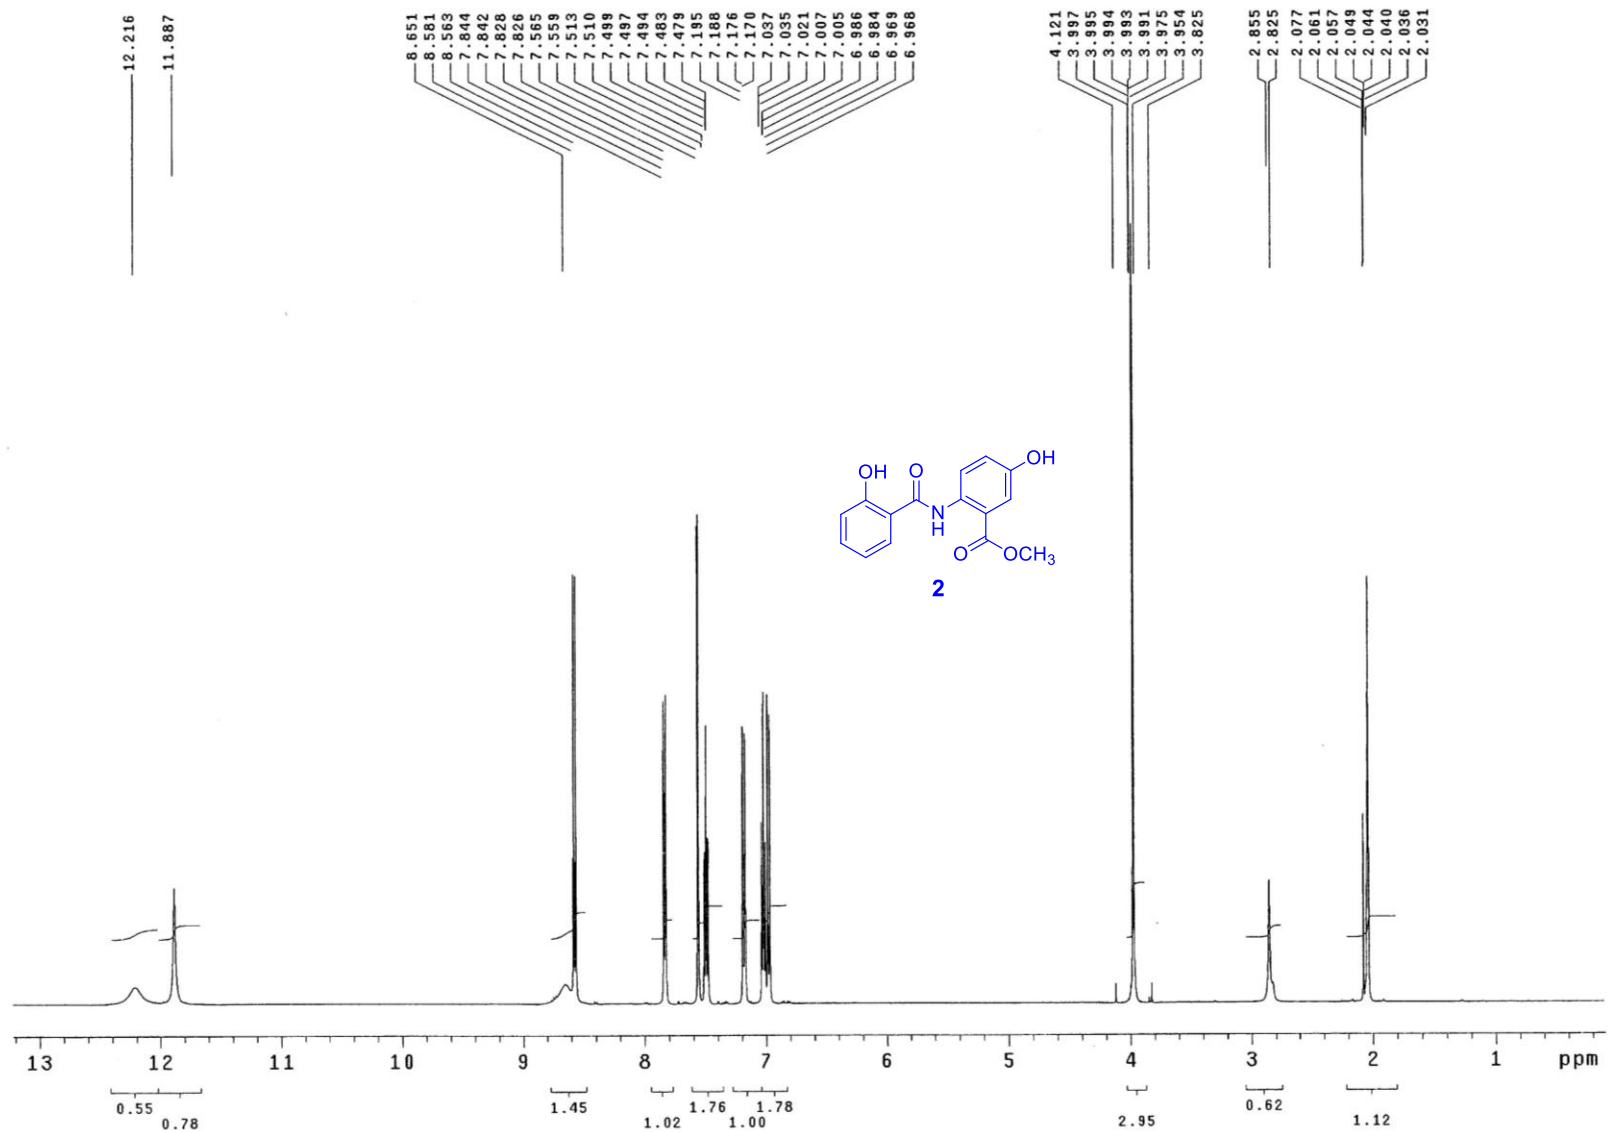

**Figure S25.** The <sup>1</sup>H NMR spectrum of compound **2** in acetone-*d*<sub>6</sub> (500 MHz).

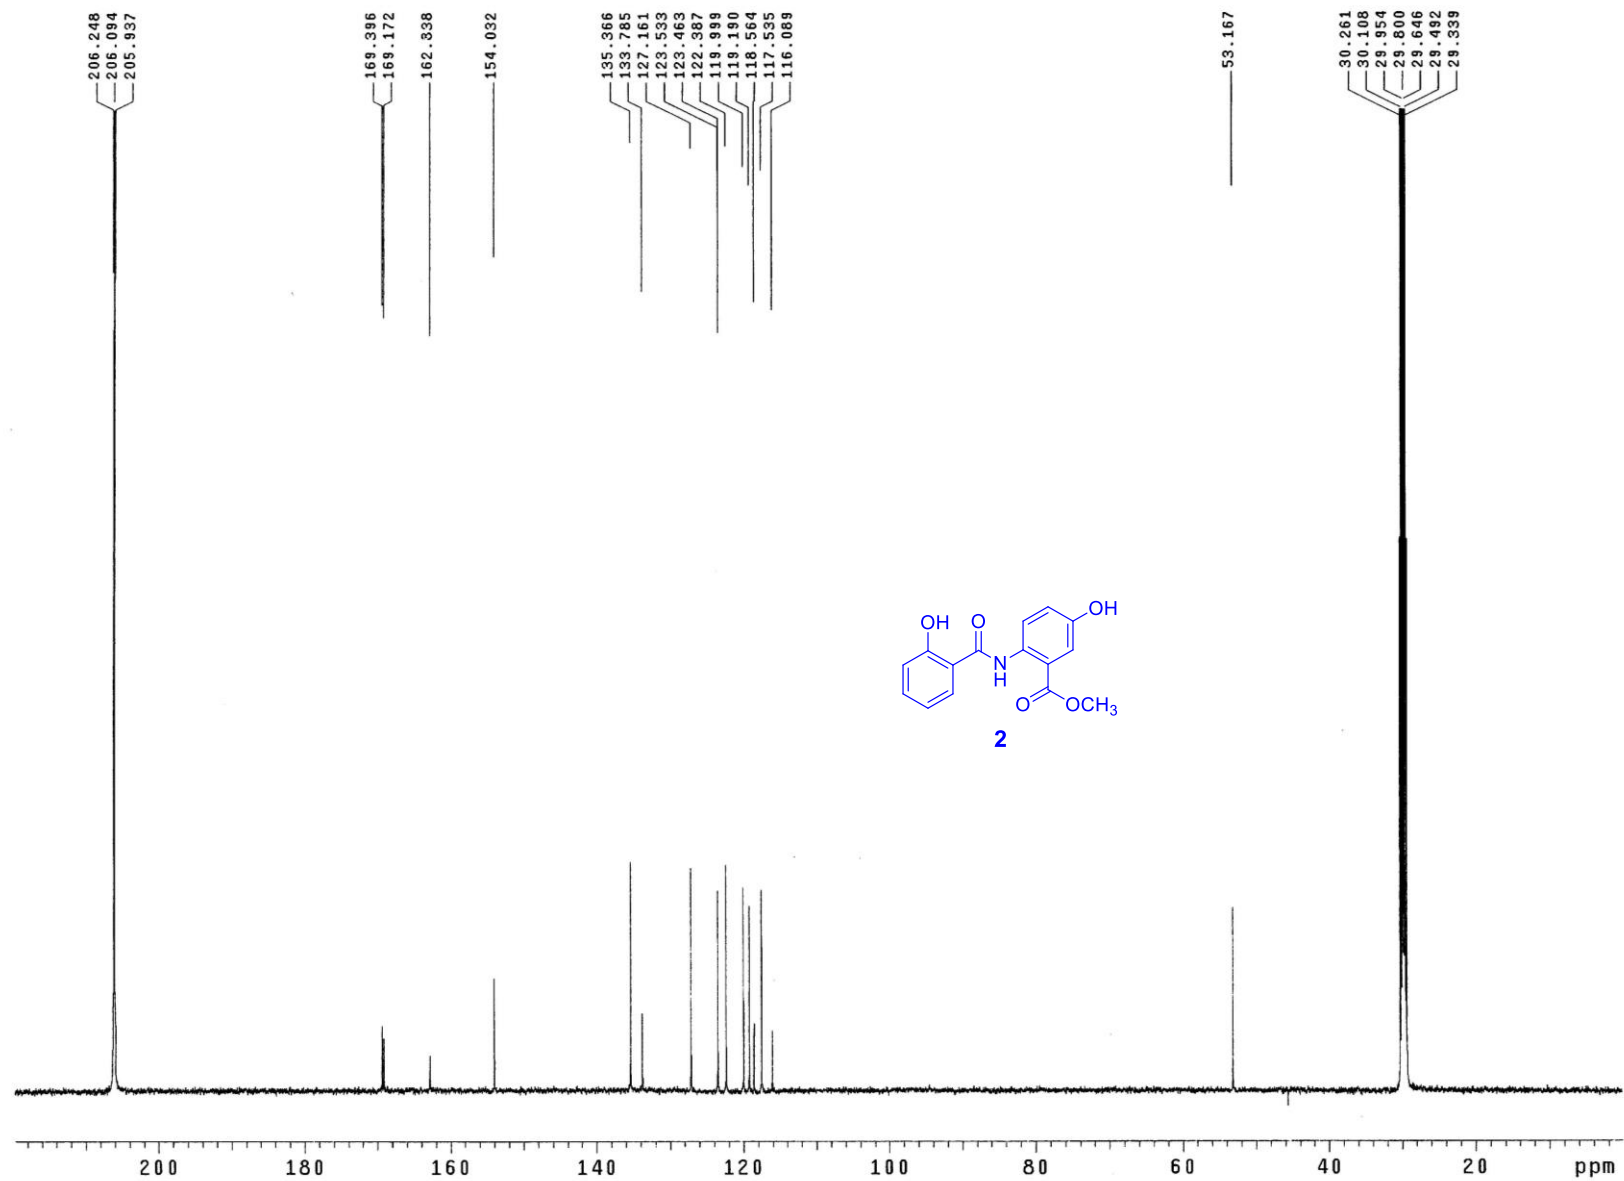

Figure S26. The  $^{13}\text{C}$  NMR spectrum of compound 2 in acetone- $d_6$  (125 MHz).

VNS-600 gCOSY CI-12 in CD3COCD3 2011.08.26

Pulse Sequence: gCOSY  
Solvent: acetone  
Temp. 25.0 C / 298.1 K  
Operator: walkup  
VNMR5-600 "wormhole"

Relax. delay 1.000 sec  
Acq. time 0.143 sec  
Width 7183.9 Hz  
2D Width 7183.9 Hz  
2 repetitions  
256 increments  
OBSERVE H1, 599.6929894 MHz  
DATA PROCESSING  
Sine bell 0.071 sec  
F1 DATA PROCESSING  
Sine bell 0.018 sec  
FT size 2048 x 2048  
Total time 10 min, 16 sec

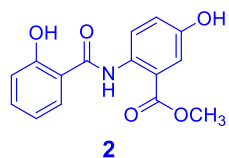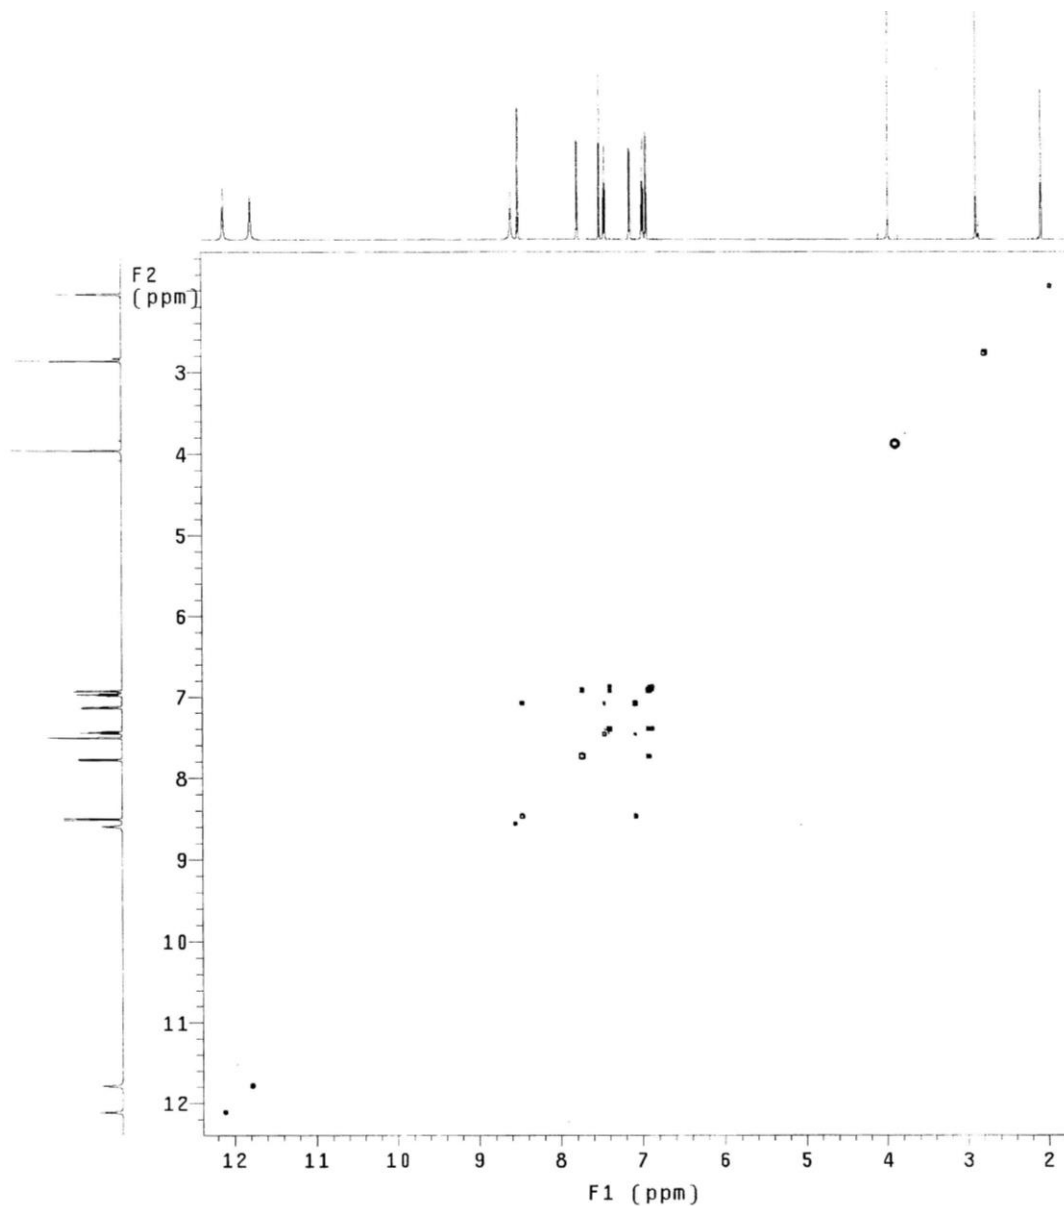

**Figure S27.** The  $^1\text{H}$ - $^1\text{H}$  COSY spectrum of compound **2** in acetone- $d_6$  (500 MHz).

Solvent: acetone  
Temp. 25.0 C / 298.1 K  
Sample #4, Operator: walkup  
File: 0402  
INOVA-500 "IMM-501"

Relax. delay 1.301 sec  
Acq. time 0.199 sec  
Width 6752.6 Hz  
2D Width 25133.5 Hz  
16 repetitions  
2 x 200 increments  
OBSERVE H1, 499.7707161 MHz  
DECOUPLE C13, 125.6787219 MHz  
Power 34 dB  
on during acquisition  
off during delay  
W40\_SW modulated  
DATA PROCESSING  
Sine bell 0.033 sec  
F1 DATA PROCESSING  
Sine bell 0.004 sec  
FT size 4096 x 2048  
Total time 2 hr, 46 min, 28 sec

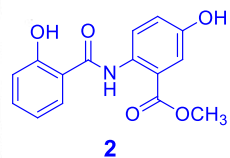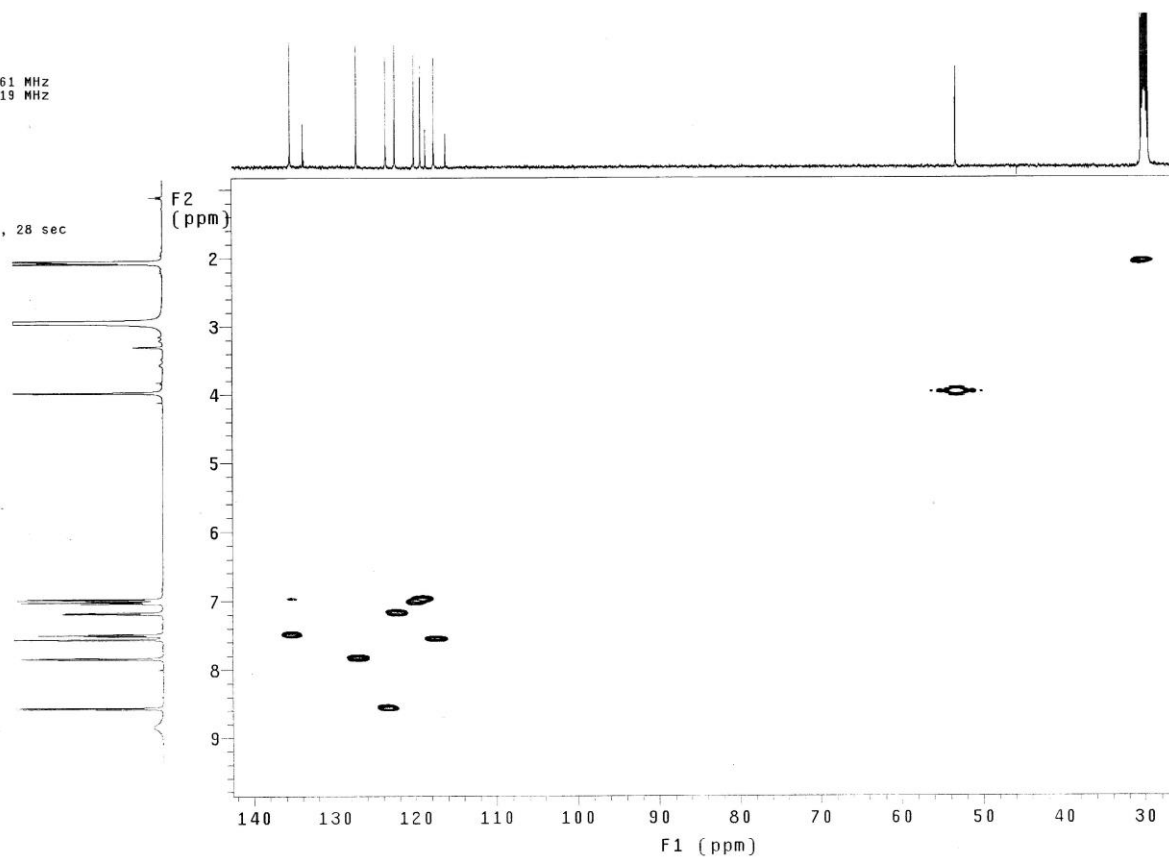

**Figure S28.** The HSQC spectrum of compound **2** in acetone- $d_6$  (500 MHz for  $^1\text{H}$ ).

Solvent: acetone  
 Temp. 25.0 C / 298.1 K  
 Sample #2, Operator: walkup  
 File: HMBCCD3COCD30915-CI-12  
 INOVA-500 "IMM-501"

Relax. delay 1.000 sec  
 Mixing 0.080 sec  
 Acq. time 0.128 sec  
 Width 6752.2 Hz  
 2D Width 30154.5 Hz  
 32 repetitions  
 256 increments  
 OBSERVE H1, 499.7707135 MHz  
 DATA PROCESSING  
 Sine bell 0.060 sec  
 F1 DATA PROCESSING  
 Sine bell 0.004 sec  
 FT size 4096 x 2048  
 Total time 2 hr, 46 min, 23 sec

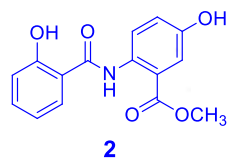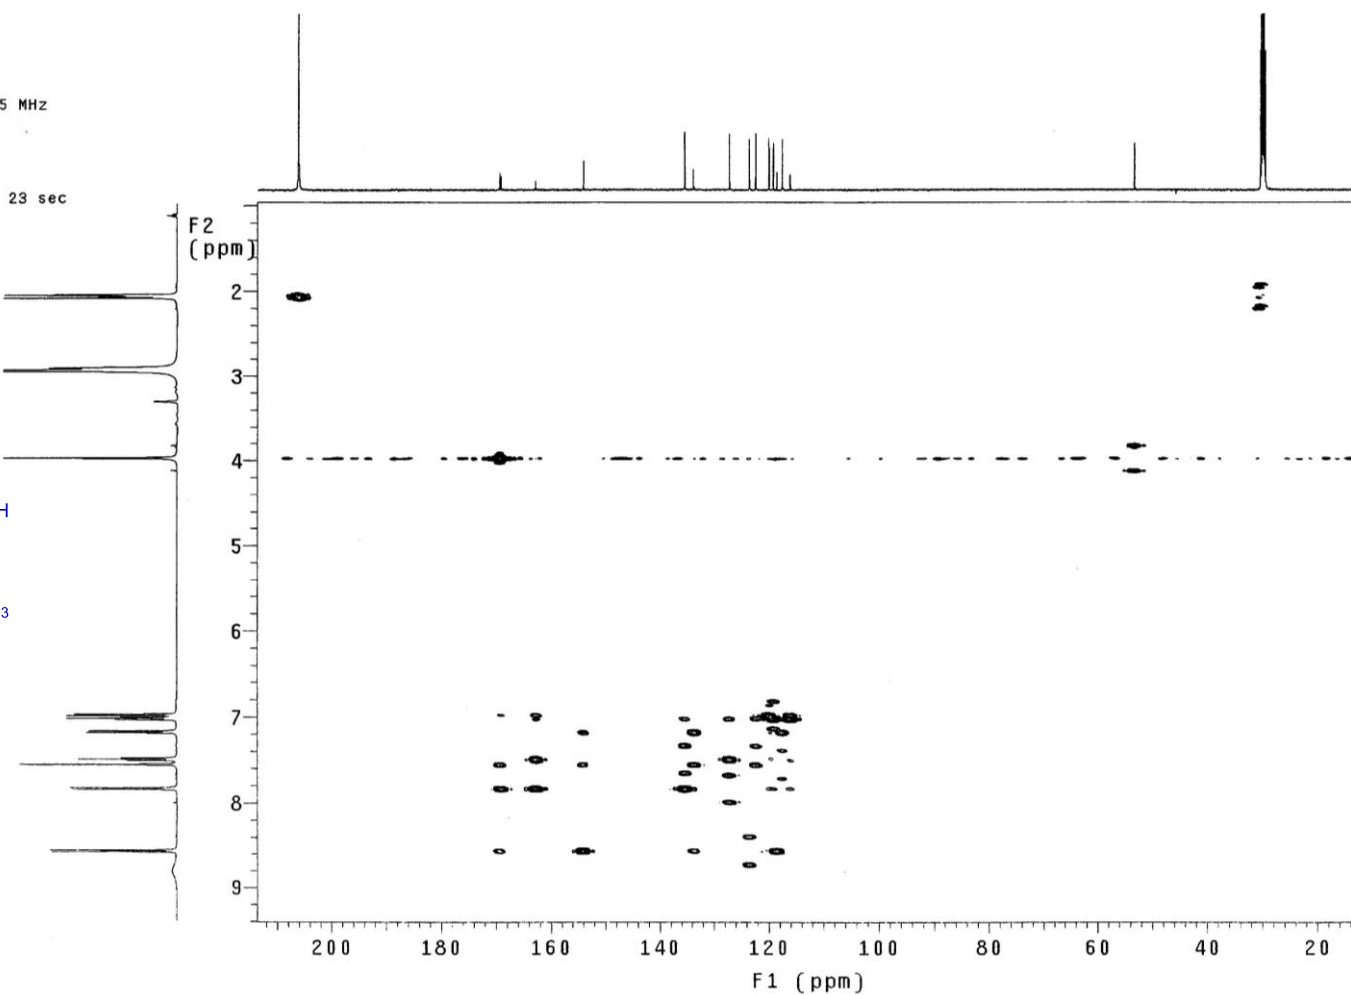

**Figure S29.** The HMBC spectrum of compound **2** in acetone-*d*<sub>6</sub> (500 MHz for <sup>1</sup>H).

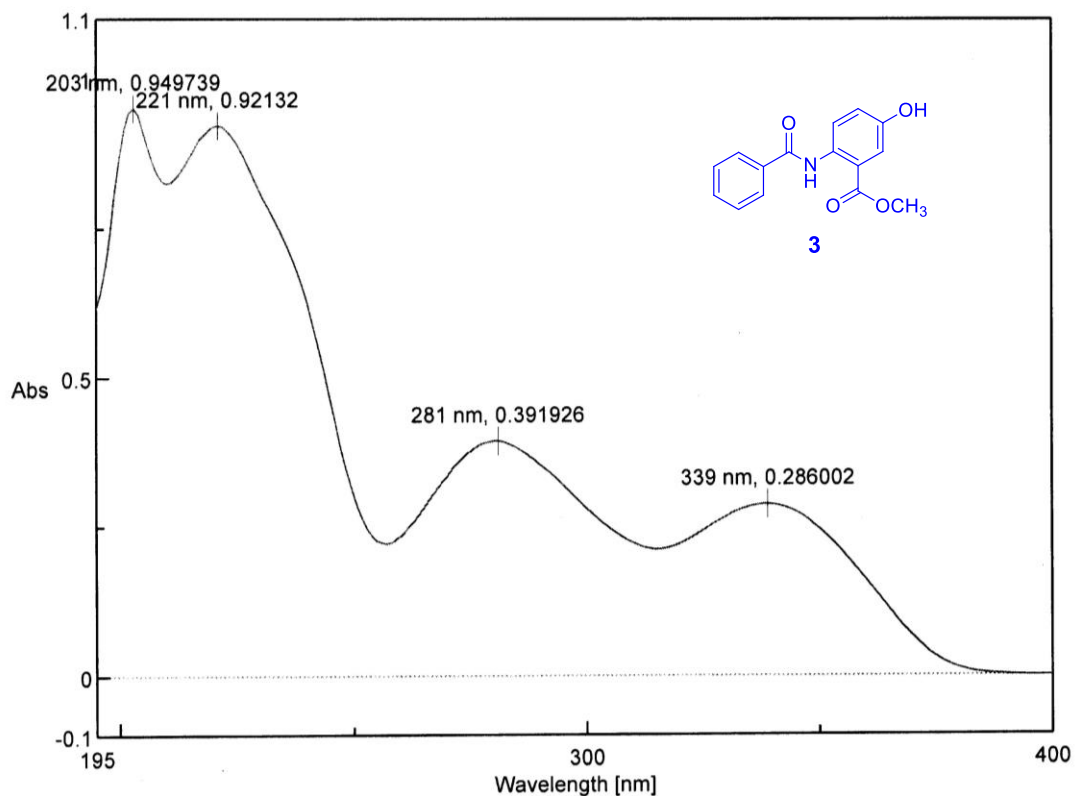

[Comment] Memory-10

Sample Name CI-18

Comment

User

Division

Company 324

[Measurement Information]

Instrument Name V-650

Model Name V-650

Serial No. A034461150

Accessory PSC-718

Accessory S/N A001761114

Position 1

Cell Length 10 mm

Temperature 20.00 C

Control Sensor Holder

Monitor Sensor Holder

Start Mode Start immediately

[Data Information]

Creation Date 2011-9-14 16:28

Data array type Linear data array

Horizontal Wavelength [nm]

Vertical Abs

Start 400 nm

End 195 nm

Data pitch 1 nm

Data points 206

Photometric Mode Abs

Measurement range 400 - 195 nm

Data pitch 1 nm

Band width(UV/Vis) 1.0 nm

Response Medium

Scanning speed 200 nm/min

Source Change 340 nm

Light Source D2/WI

Filter Exchange Step

Correction Baseline

**Figure S30.** The UV spectrum of compound **3** in MeOH.



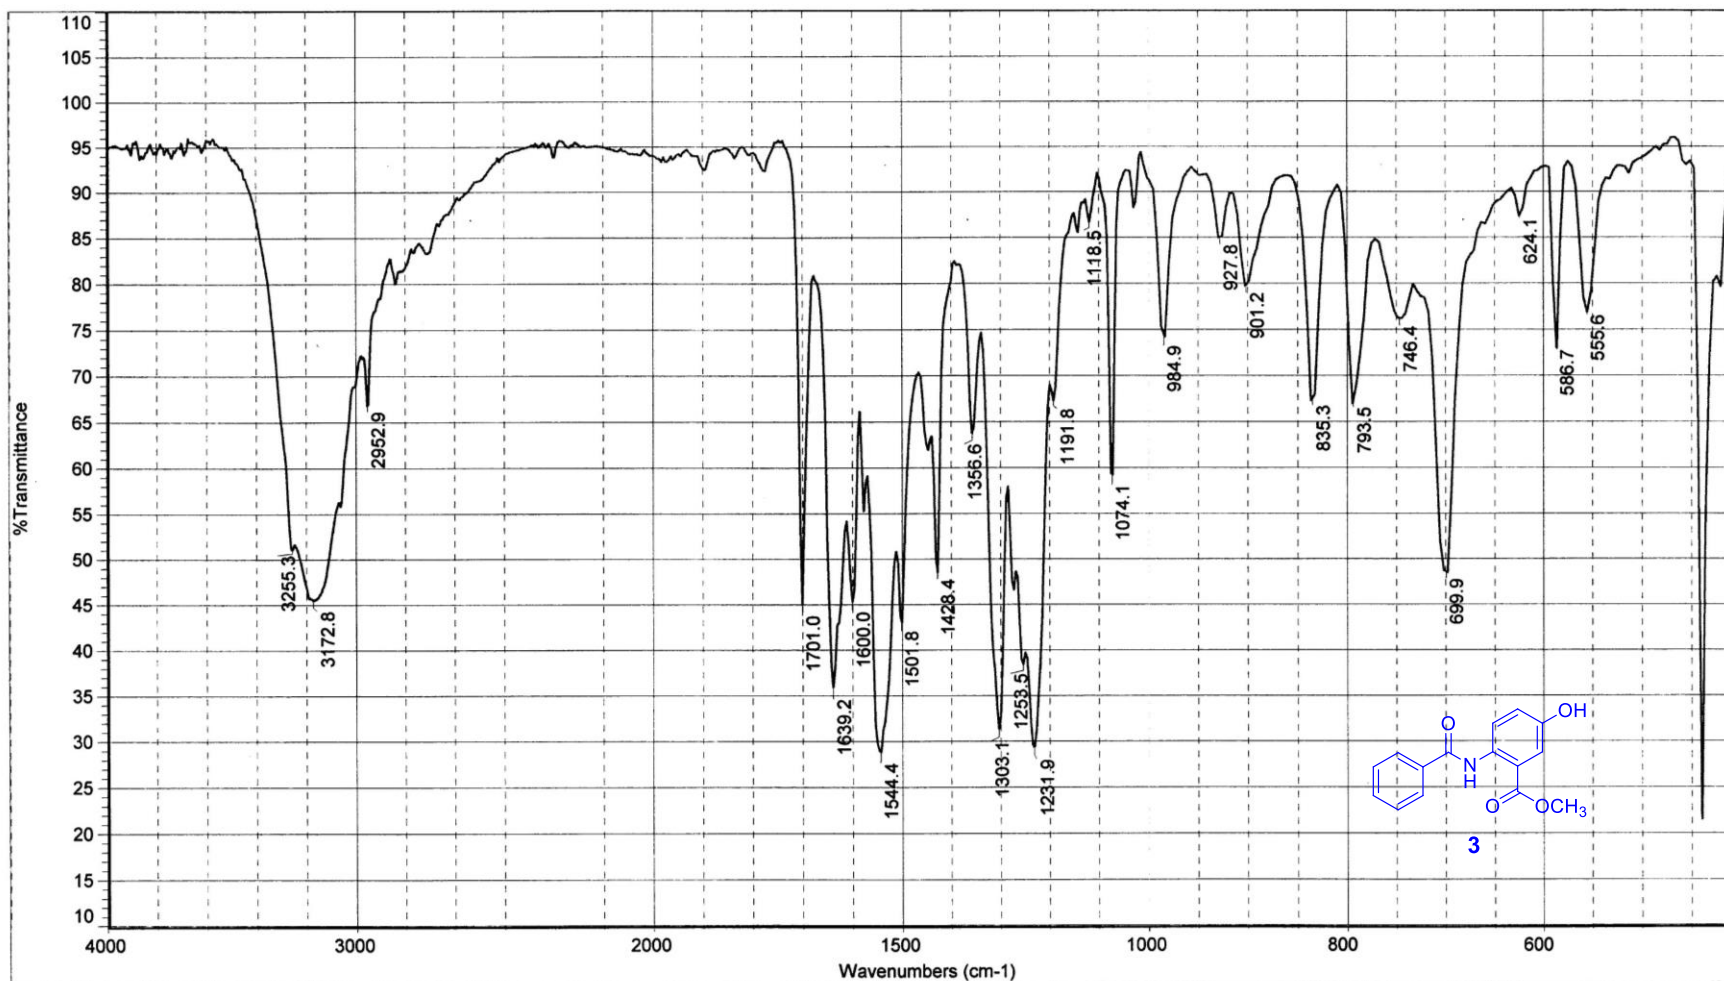

日期: 星期三 5月 18 13:33:42 2011 (GMT+08:00) Sample Name: Cl - 18

(显微镜透射法FT- IR Microscope Transmission)

扫描次数: 100

傅里叶变换红外显微镜 (FT-IR Microscope): Centaurus

分辨率: 8.000

美国热电公司 (Thermo) 傅里叶变换红外光谱仪: Nicolet 5700

Figure S31. The IR spectrum of compound 3.

# Display Report - Selected Window Selected Analysis

**Analysis Name:** chenmh12.d  
**Method:** TEST.MS  
**Sample Name:** CI-18  
**Analysis Info:**

**Instrument:** LC-MSD-Trap-SL  
**Operator:** Operator

**Print Date:** 6/30/2010 1:19:45 PM  
**Acq. Date:** 6/30/2010 1:10:43 PM

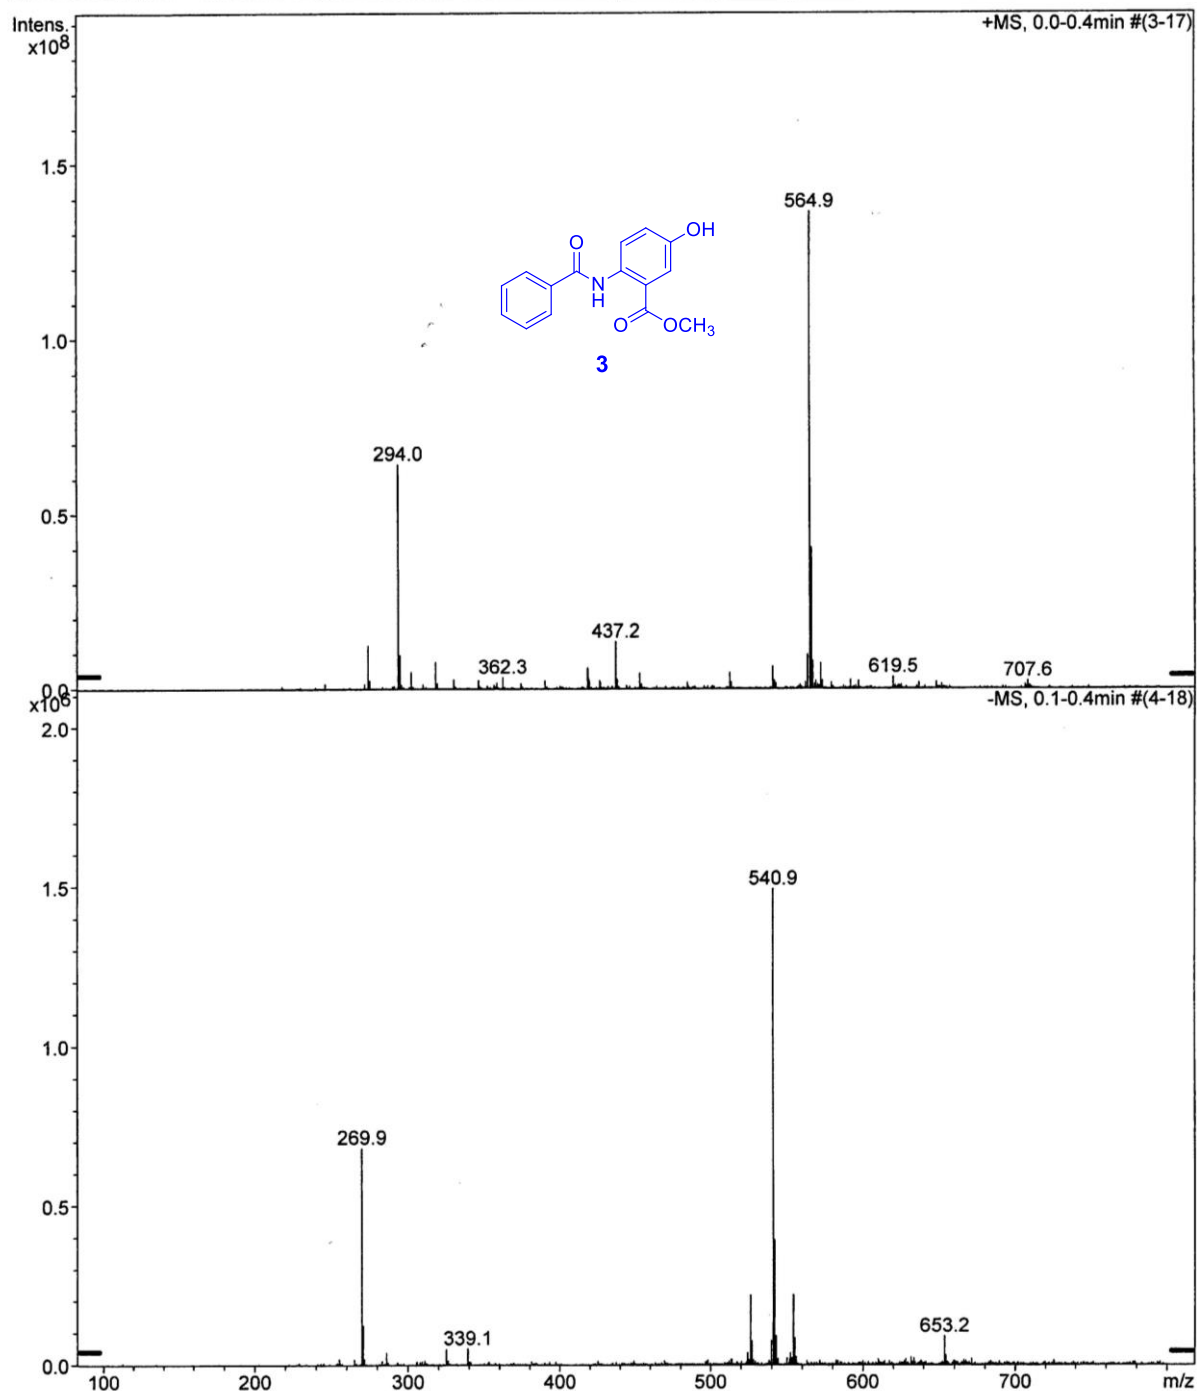

**Figure S32.** The ESI mass spectrum of compound 3.

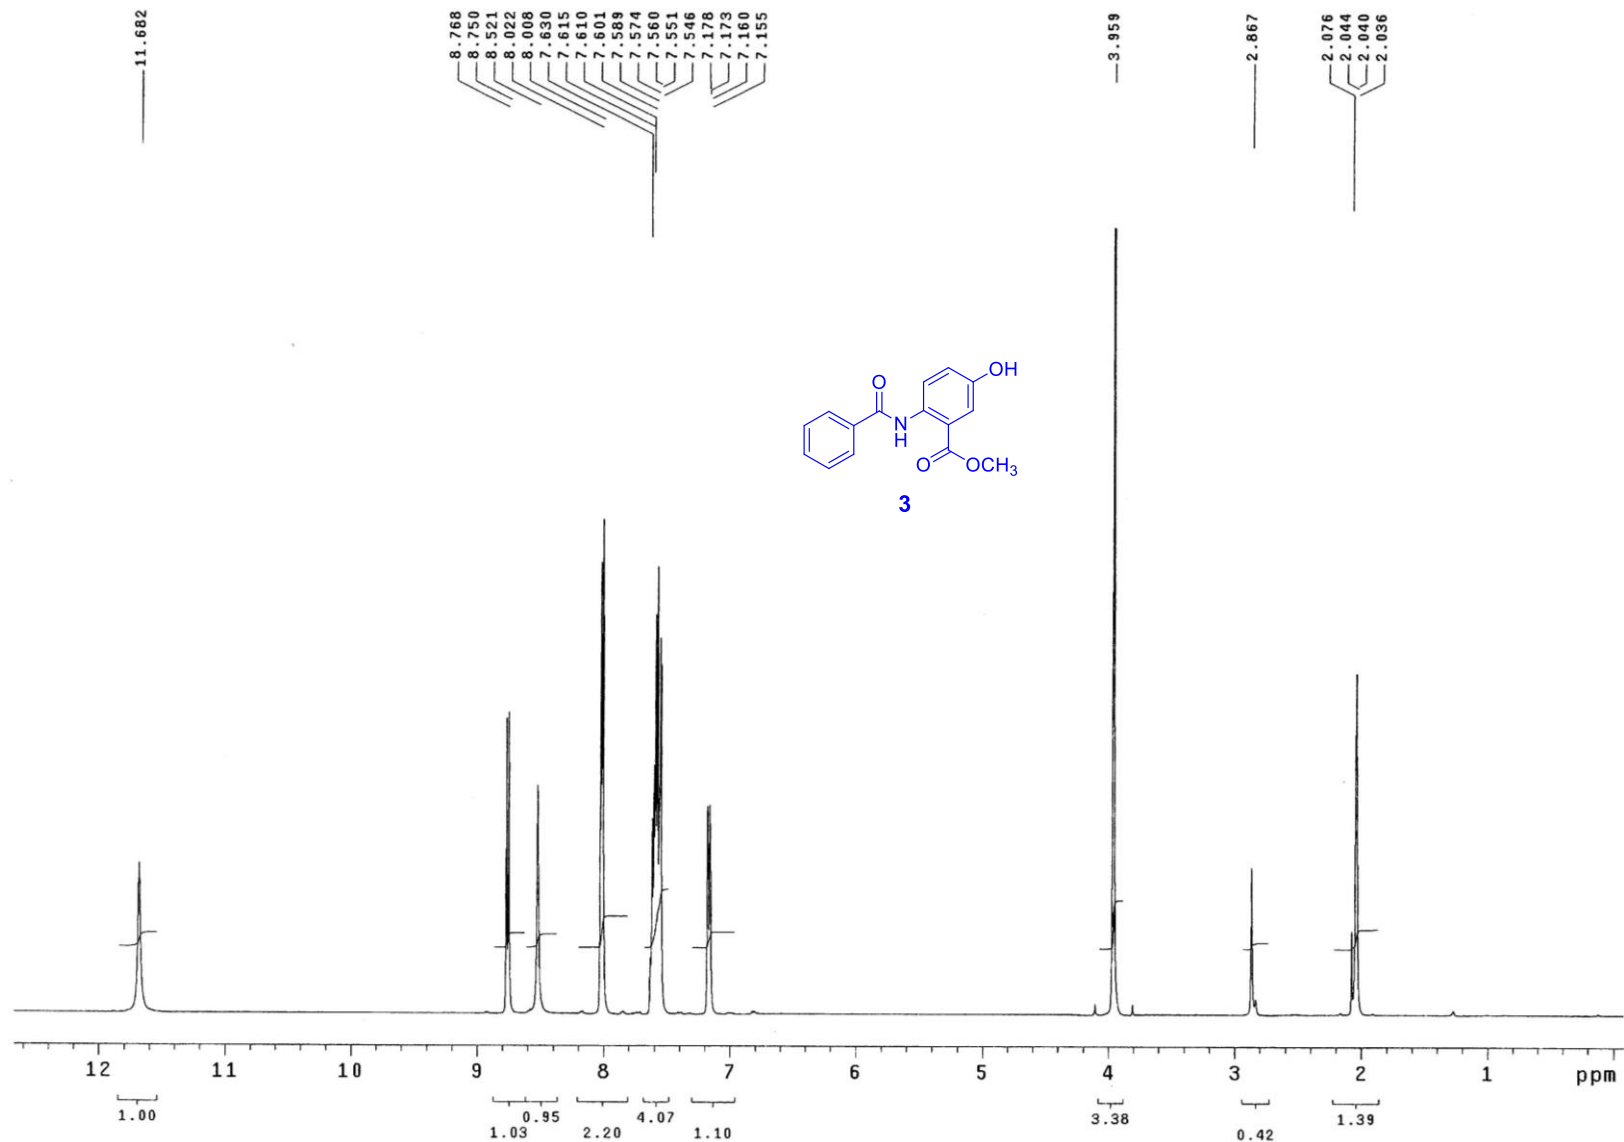

Figure S33. The  $^1\text{H}$  NMR spectrum of compound 3 in acetone- $d_6$  (500 MHz).

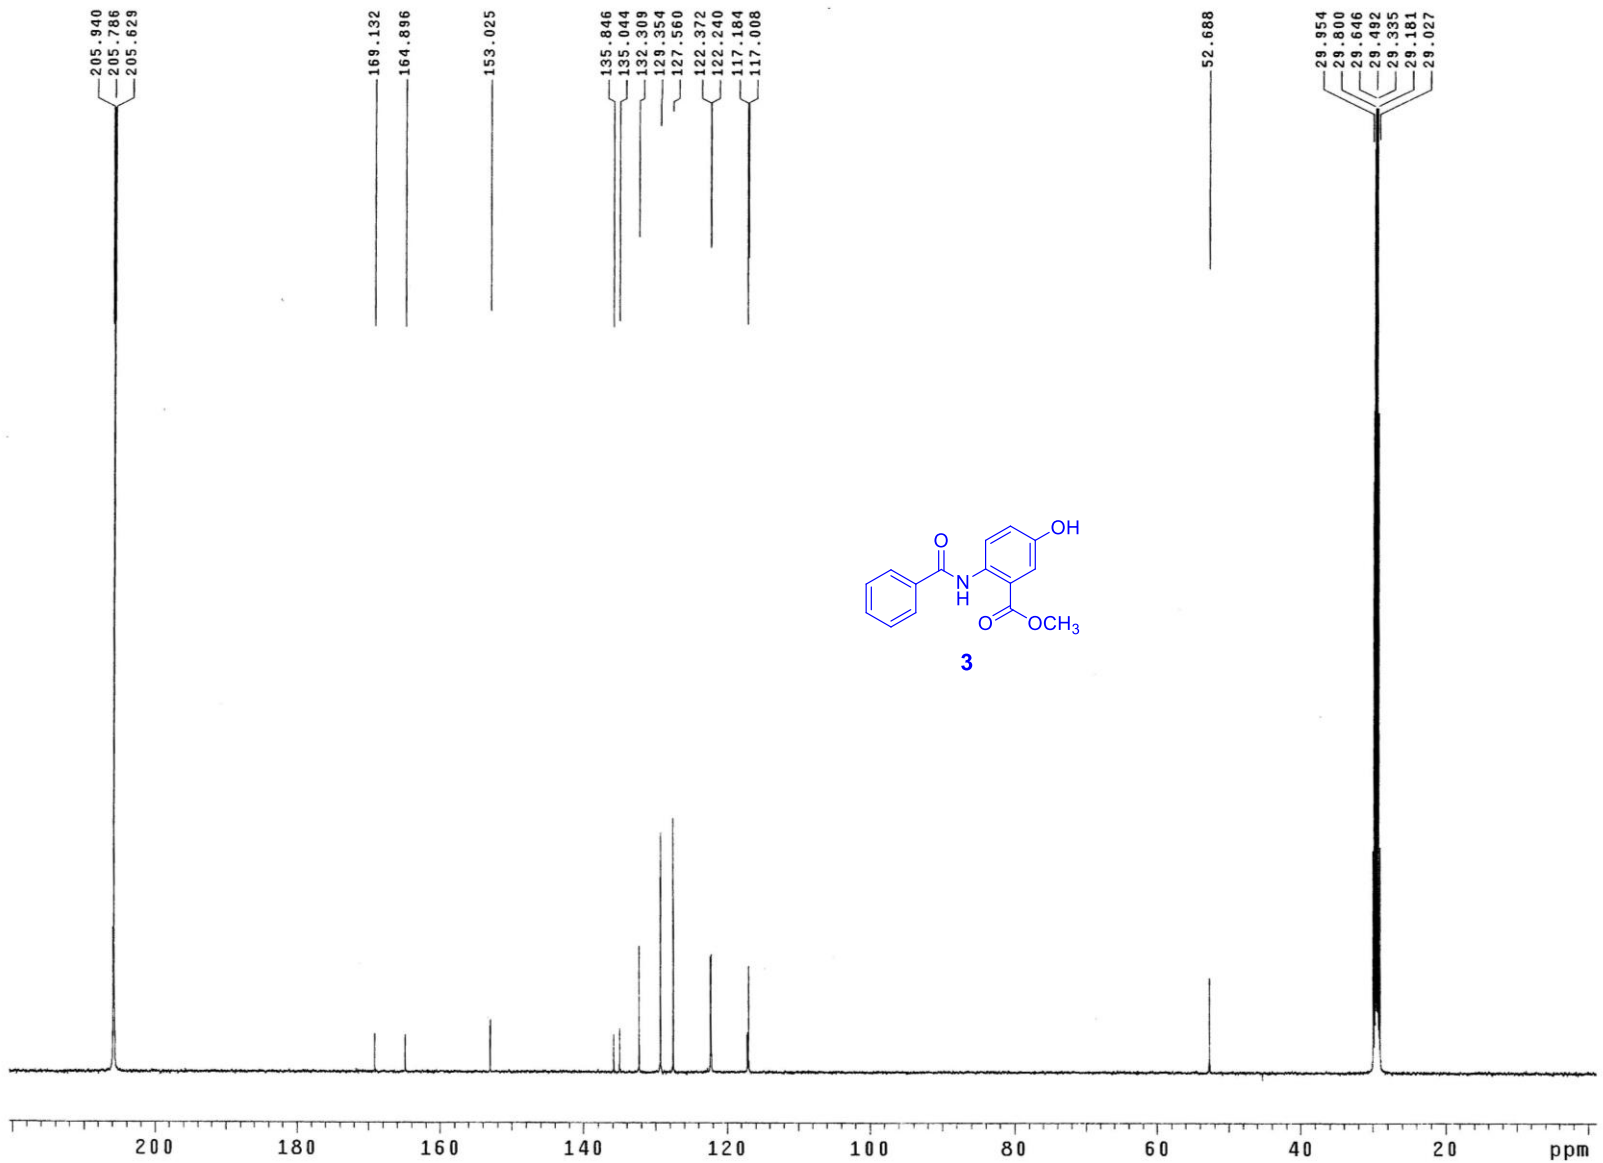

Figure S34. The  $^{13}\text{C}$  NMR spectrum of compound 3 in acetone- $d_6$  (125 MHz).

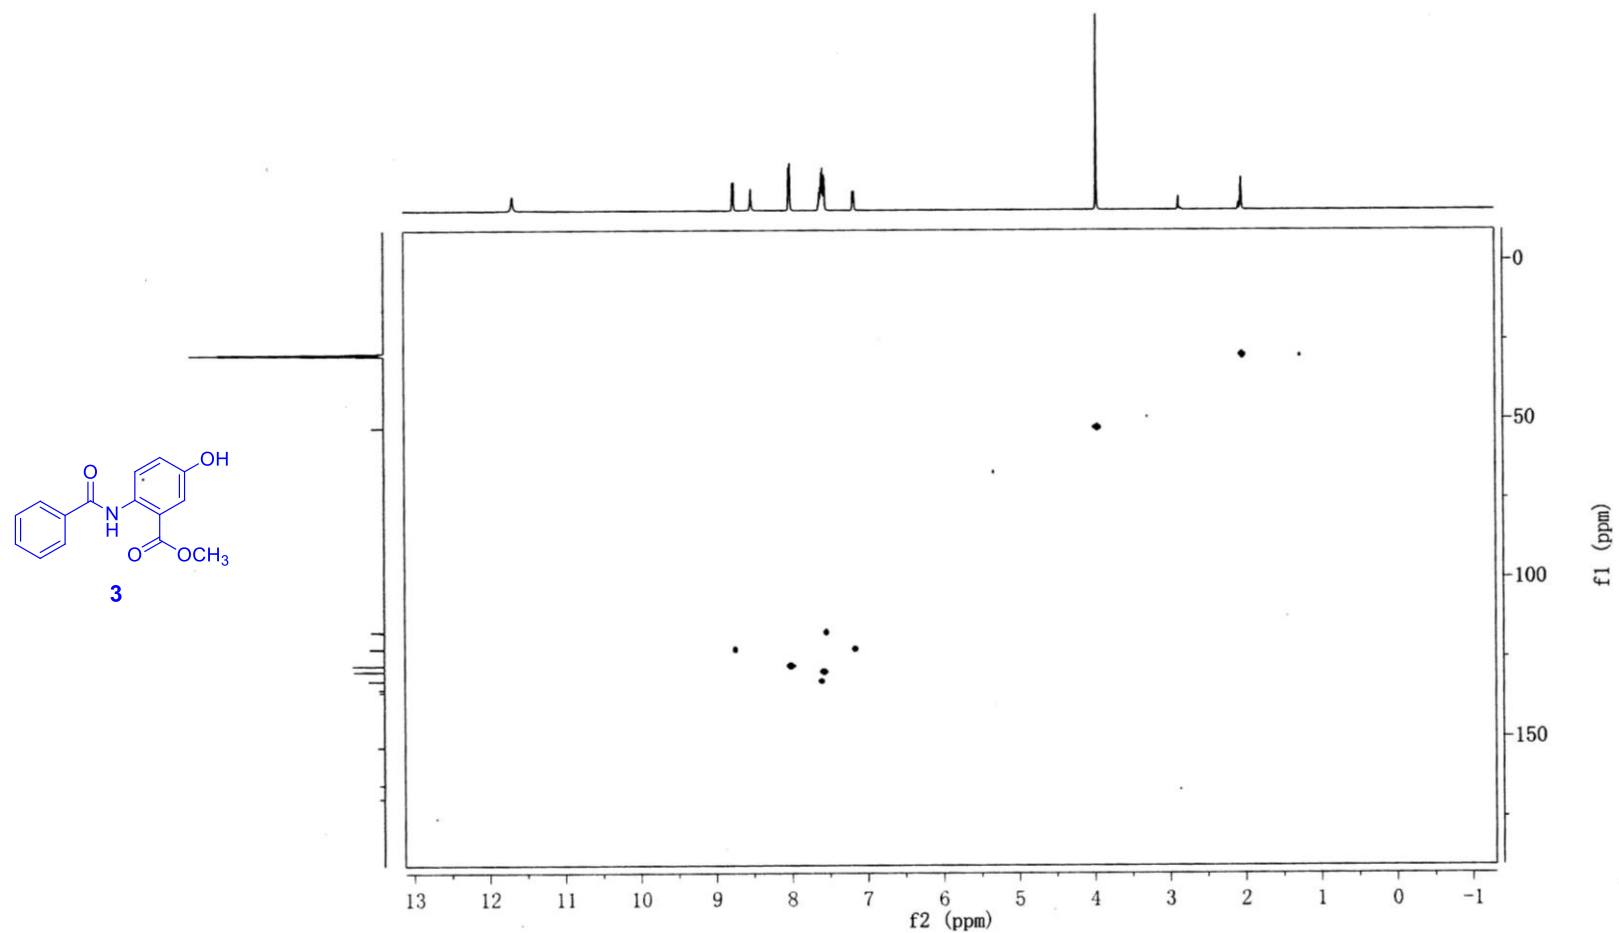

**Figure S35.** The HSQC spectrum of compound **3** in acetone-*d*<sub>6</sub> (500 MHz for <sup>1</sup>H).

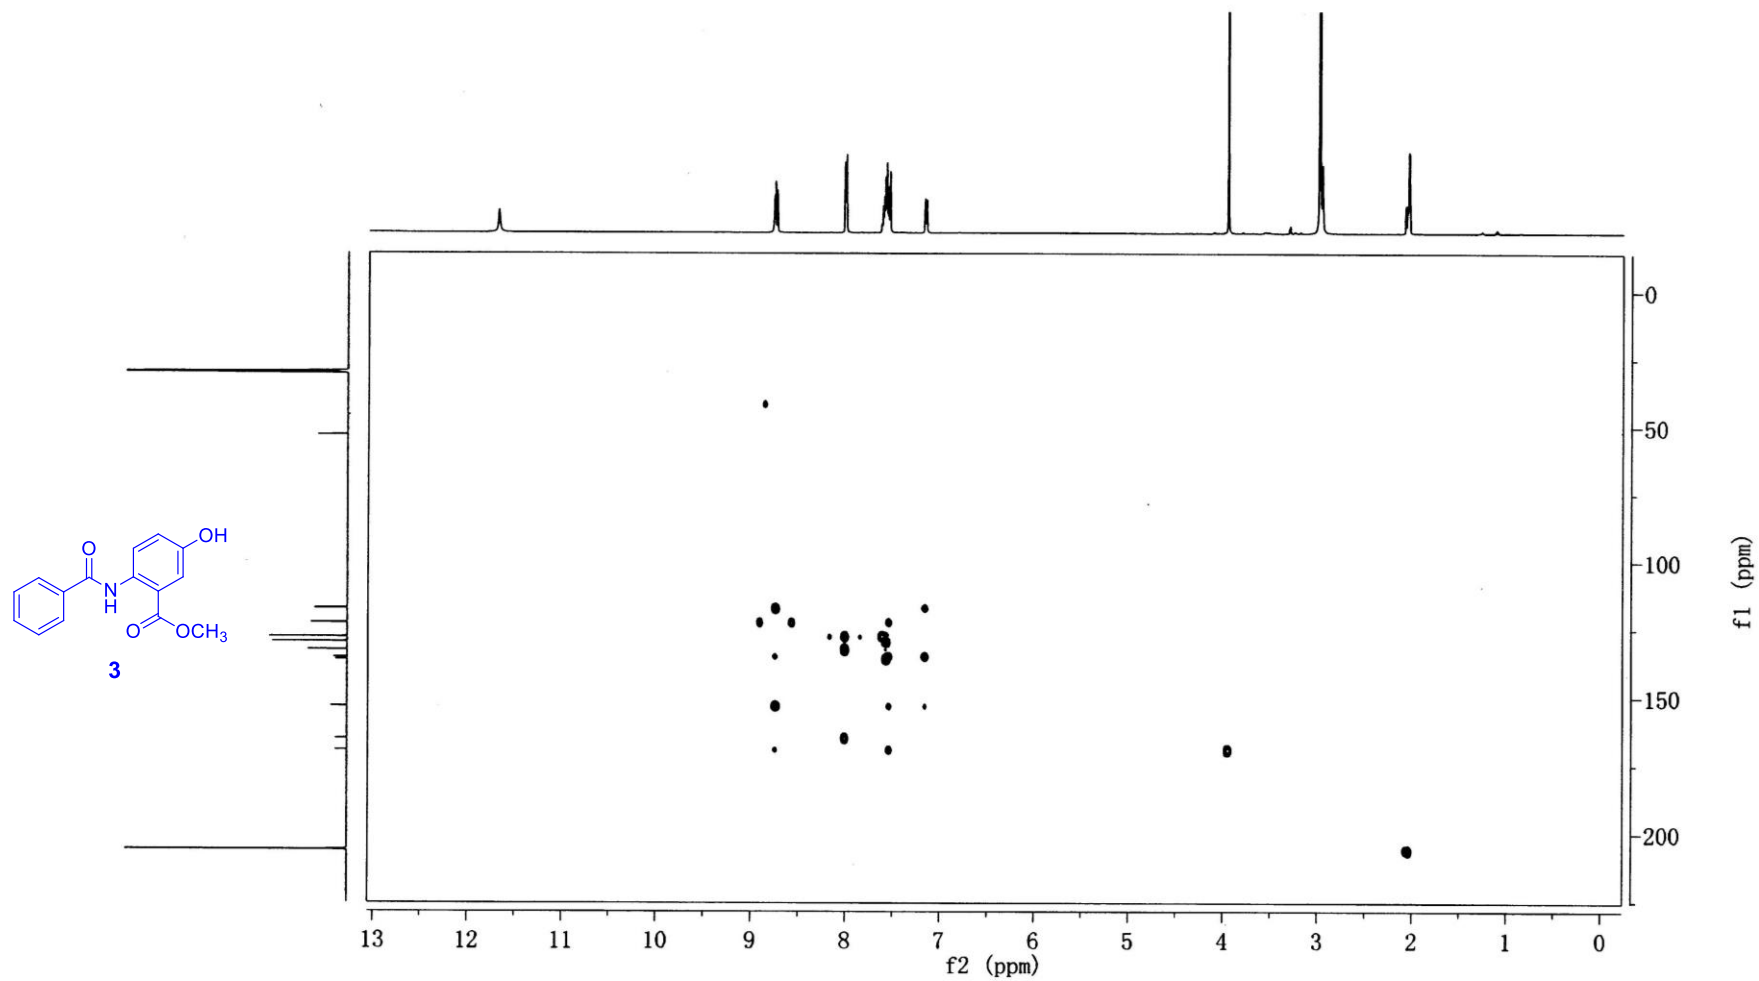

**Figure S36.** The HMBC spectrum of compound **3** in acetone- $d_6$  (500 MHz for  $^1\text{H}$ ).
